# The role of phenotypic plasticity in the establishment of range margins

Martin Eriksson<sup>1,2,3†</sup>, Marina Rafajlović<sup>1,2\*</sup>

1. Department of Marine Sciences, University of Gothenburg, Gothenburg, Sweden;

2. The Linnaeus Centre for Marine Evolutionary Biology, University of Gothenburg, Gothenburg, Sweden;

3. Gothenburg Global Biodiversity Centre, University of Gothenburg, Gothenburg, Sweden.

\* Corresponding author; e-mail: [marina.rafajlovic@marine.gu.se](mailto:marina.rafajlovic@marine.gu.se).

† e-mail: [martin.eriksson@marine.gu.se](mailto:martin.eriksson@marine.gu.se).

## Abstract

It has been argued that adaptive phenotypic plasticity may facilitate range expansions over spatially and temporally variable environments. However, plasticity may induce fitness costs. This may hinder the evolution of plasticity. Earlier modelling studies examined the role of plasticity during range expansions of populations with fixed genetic variance. However, genetic variance evolves in natural populations. This may critically alter model outcomes. We ask: How does the capacity for plasticity in populations with evolving genetic variance alter range margins that populations without the capacity for plasticity are expected to attain? We answered this question using computer simulations and analytical approximations. We found a critical plasticity cost above which the capacity for plasticity has no impact on the expected range of the population. Below the critical cost, by contrast, plasticity facilitates range expansion, extending the range in comparison to that expected for populations without plasticity. We further found that populations may evolve plasticity to buffer temporal environmental fluctuations, but only when the plasticity cost is below the critical cost. Thus, the cost of plasticity is a key factor involved in range expansions of populations with the potential to express plastic response in the adaptive trait.

## Keywords

Cost of plasticity, critical environmental gradient, range limits, environmental fluctuations, genetic canalisation, climate change adaptation

## 34 1 Introduction

36 Due to ongoing climate change and increasing human impact on ecosystems,  
37 many populations need to adapt to novel conditions either in their present geo-  
38 graphical distributions, or in new areas they face with while altering their ranges  
39 [1, 2, 3, 4, 5]. A critical factor constraining local adaptation and thereby preclud-  
40 ing successful range expansions is maladaptive gene flow [6, 7]. Theoretically, it  
41 has been shown that, when genetic variance is fixed and the population is faced  
42 with a sufficiently steep constant environmental gradient, maladaptive gene flow  
43 swamps local adaptation. This results in a finite range of the population [8] (see  
44 also [9]).

45 However, genetic variance in natural populations is expected to evolve. Nota-  
46 bly, the above theoretical prediction is critically altered when genetic variance  
47 is allowed to evolve. Under this assumption, populations expanding their ranges  
48 over an environment that changes linearly in space (with a constant carrying  
49 capacity) will either adapt to the entire available habitat or face global extinc-  
50 tion [10]. In this case, thus, range margins are trivial: they either coincide with  
51 the habitat edges or, when the habitat is unlimited, range margins are absent.

52 By contrast, non-trivial range margins exist when a population expands its  
53 range over a steepening environmental gradient, and this is true even when  
54 the available habitat is infinite [10, 11]. In this case, local genetic variance  
55 increases with increasing local steepness of the environmental gradient until the  
56 genetic load becomes so strong that the population is precluded from adapting  
57 further. This is seen as a progressively decreasing expected local population  
58 size (despite the assumption that the carrying capacity is constant over the  
59 habitat) down to the point where drift becomes stronger than selection [11].  
60 Conversely, for range expansions over environments that change linearly in space  
61 (with genetic variance allowed to evolve), drift may cause non-trivial range  
62 margins to be established when the local carrying capacity decreases away from  
63 the core habitat [11].

64 The results outlined above deliver an insight into potential mechanisms in-  
65 volved in the establishment of range limits. However, they do not account for  
66 phenotypic plasticity (hereafter referred to as *plasticity*), that is, the ability  
67 of a genotype to produce different phenotypes depending on the environment  
68 [12, 13, 14, 15, 16].

69 Plasticity may be an important mechanism for populations to buffer envi-  
70 ronmental changes, as shown both empirically [17, 18, 19, 20, 21, 22] and theo-  
71 retically [9, 13, 16, 23, 24, 25]. This is especially true when plasticity is adaptive  
72 (moving phenotypes towards the local optimum) [26, 27]. However, plasticity  
73 may also be neutral or maladaptive (moving phenotypes away from the local  
74 optimum) [28]. Maladaptive plasticity may have a temporary adverse effect on  
75 local adaptation but, in the long run, it may promote genetic adaptation by  
76 enhancing the strength of selection [29, 30, 31].

77 However, it has been empirically observed that plasticity does not always  
78 contribute to the persistence of populations [32]. Indeed, plasticity may have  
79 costs or limits [33, 34], and these may limit the utility of plasticity for adaptation

to new or changing environments [35].

80 Understanding the evolution of plasticity along environmental gradients, and  
its role on local adaptation has been the focus of a number of theoretical studies  
82 (e.g., [9, 23, 25, 36]). For example, in [23], it was found that, in areas where  
the difference between the local phenotypic optimum and the globally average  
84 optimum was larger, local adaptation was facilitated by the evolution of locally  
higher plasticity. This is, in part, because migration was implemented accord-  
86 ing to the island model (*sensu* [37]). In this model, immigration has a strongly  
deleterious effect on the local mean phenotype when it deviates strongly from  
88 the global mean. This causes local maladaptation, which produces directional  
selection to restore the local mean phenotype to its optimum. Consequently,  
90 plasticity is under stronger selection when the difference between the local en-  
vironment and the reference environment (as defined in [38]) is larger. Notably,  
92 the model in [23] was deterministic and it was assumed that genetic variance  
was fixed. These assumptions may bear both qualitative and quantitative con-  
94 sequences on the results obtained.

A similar result was found in a model with an environment that changes  
96 linearly in space and a density regulated population (*albeit* without drift) [9].  
As a consequence, plasticity increased the range attained by the population in  
98 comparison to the case without plasticity [9]. Notably, the results in [9] relied  
on two assumptions that may critically affect the model outcomes, especially  
100 regarding the range that the population is expected to attain. Namely, genetic  
variance was fixed and the carrying capacity was decreasing away from the  
102 centre of the range. As explained above (see also [11]), these assumptions are  
responsible for the establishment of non-trivial range margins in an environment  
104 that changes linearly in space. These assumptions were relaxed in [25], where  
it was found that transiently increased plasticity evolves in spatial locations  
106 that have a long history of environmental change, or at the expansion front  
for a population undergoing range expansion into a habitat that requires new  
108 adaptations (termed “niche expansion” in that study). Notably, in [25] the  
environment changed linearly in space. This precluded the establishment of  
110 non-trivial range margins in that study.

In summary, the role of plasticity on the establishment of non-trivial range  
112 margins, when genetic variance is allowed to evolve, remains unclear. Here we  
address this issue by modelling a population, with evolving genetic variance,  
114 expanding its range over a steepening environmental gradient. This is a situa-  
tion in which a population without plasticity is expected to attain a non-trivial  
116 range margin, even when the carrying capacity is not constrained to be de-  
creasing away from the core habitat [11]. Specifically, we ask: How does a  
118 population’s capacity for plasticity impact on the establishment of range mar-  
gins when genetic variance is allowed to evolve and the local carrying capacity  
120 is constant? What is the role of plasticity costs in this context? What is the  
spatial pattern of allele frequencies at the underlying loci?

122 To answer these questions, we extend the individual-based model from [11]  
to encompass the capacity for plasticity. This was done by assuming that the  
124 adaptive trait had a non-plastic and a plastic component. We further used a

126 simplified version of our model to derive an analytical expression for the *opti-*  
127 *mal plasticity*, that is plasticity that maximises the population’s mean fitness  
128 in quasi-equilibrium. We note that we used here *quasi*, because all finite pop-  
129 ulations with a finite growth rate will eventually go extinct [39]. With this  
130 caution in mind, we use throughout *equilibrium* in place of *quasi-equilibrium*,  
for simplicity.

Our main finding is that there is a critical cost of plasticity below which the  
132 ability to express and evolve plasticity leads to a wider range than for popula-  
133 tions lacking this ability. Furthermore, we found a second critical cost below  
134 which the range may be infinite. Finally, we found that the equilibrium spatial  
135 patterns of allele frequencies at loci contributing to the non-plastic component  
136 of the phenotype have the same clinal shape as without plasticity, but the spac-  
137 ing between the clines is increased when plasticity is larger. For the plastic  
138 component of the phenotype, we found that the frequencies of alleles associated  
139 with positive plasticity increased in a cline-like manner towards the edges of the  
140 habitat only when the cost of plasticity was below the critical cost. Otherwise  
no clinal pattern emerged.

## 142 2 Methods

We used computer simulations to investigate the impact of plasticity on the  
144 evolution of range margins. The simulations were performed using custom-made  
Matlab code (will be submitted to Dryad upon acceptance of the manuscript).

145 We extended the model previously considered in [40] (see also [11, 41]), in  
146 which a population expanded its range over a habitat with a steepening envi-  
147 ronmental gradient, assuming a single trait under selection. In addition, in the  
148 present work we assumed that the phenotype was determined by a combination  
149 of a non-plastic and a plastic component. We further allowed the optimal phe-  
150 notype to fluctuate in time. These model modifications are explained in more  
151 detail below.

The habitat consisted of a one-dimensional chain of  $M = 220$  demes, each  
154 with a local carrying capacity of  $K = 100$  diploid individuals (unless otherwise  
stated; see Appendix A for details regarding parameter choices, and table 1  
155 that lists the notations used throughout). The generations were discrete and  
non-overlapping. The individuals were monoecious and mating was assumed to  
156 occur randomly with selfing allowed at no cost. As in [11, 40], we assumed a  
gradually steepening environmental gradient along the habitat: in each deme,  
157  $i = 1, 2, \dots, M$ , the average optimal phenotype for the trait under selection,  $\bar{\theta}^{(i)}$ ,  
158 was given by a cubic polynomial of the deme number,  $i$ , such that  $\bar{\theta}^{(i)}$  ranged  
159 between  $\pm 252.9$  (figure A1). This polynomial was chosen to be symmetric with  
160 a horizontal inflection point at the centre of the habitat, where the optimal  
161 phenotype was assumed to be zero (Appendix A). Recall that a steepening  
162 (but not a constant) environmental gradient allows non-trivial range margins to  
163 be established in a population lacking the capacity for a plastic response. To  
164 further understand the role of a gradually steepening as opposed to a constant  
165

168 gradient on the evolution of the spatial pattern in plasticity in the population,  
 we also performed simulations along an environment that changes linearly in  
 170 space (i.e., along a constant gradient; Appendix A). We further assumed that  
 the realised optimal value for the phenotype is either temporally constant or that  
 172 it fluctuates in time. In the latter case, we assumed that in deme  $i$  in generation  
 $\tau$ , the optimal phenotype (denoted by  $\theta_\tau^{(i)}$  hereafter) is a normally distributed  
 174 random variable with mean  $\bar{\theta}^{(i)}$  and standard deviation  $\sigma_\theta$  (see table A1 for a  
 list of parameter values explored). For simplicity, we assumed that fluctuations  
 176 in the optimal phenotype were temporally and spatially uncorrelated.

Table 1: Explanation of the notations used throughout.

| Notation                             | Description                                                                                                                      |
|--------------------------------------|----------------------------------------------------------------------------------------------------------------------------------|
| $M$                                  | Number of demes in the habitat                                                                                                   |
| $K$                                  | Carrying capacity per deme                                                                                                       |
| $N_\tau^{(i)}$                       | Local population size in deme $i$ in generation $\tau$                                                                           |
| $\theta_\tau^{(i)}$                  | Optimal phenotype in deme $i$ in generation $\tau$                                                                               |
| $\bar{\theta}^{(i)}$                 | Average optimal phenotype in deme $i$                                                                                            |
| $\sigma_\theta$                      | Standard deviation of environmental fluctuations                                                                                 |
| $u_{\tau,k}^{(i)}$                   | Phenotype of the trait under selection for individual $k$<br>in deme $i$ in generation $\tau$                                    |
| $z_{\tau,k}^{(i)}$                   | Non-plastic component of the phenotype for<br>individual $k$ in deme $i$ in generation $\tau$                                    |
| $g_{\tau,k}^{(i)}$                   | Plasticity of the phenotype for individual $k$<br>in deme $i$ in generation $\tau$                                               |
| $W_{\tau,k}^{(i)}$                   | Fitness of individual $k$ in deme $i$ in generation $\tau$                                                                       |
| $C_\gamma(g_{\tau,k}^{(i)}, \delta)$ | Cost-related function for plasticity                                                                                             |
| $\gamma$                             | Shape parameter for the cost-related function                                                                                    |
| $\delta$                             | Scale parameter for the cost-related function                                                                                    |
| $r_{\tau,k}^{(i)}$                   | Growth rate of individual $k$ in deme $i$ in generation $\tau$                                                                   |
| $r_m$                                | Maximal intrinsic growth rate                                                                                                    |
| $V_S$                                | Width of stabilising selection                                                                                                   |
| $\mu$                                | Mutation rate                                                                                                                    |
| $L$                                  | Number of loci under selection for the non-plastic as well as<br>for the plastic component of the phenotype (total of $2L$ loci) |
| $\alpha$                             | Effect size of alleles coding for the non-plastic component<br>of the phenotype                                                  |
| $\beta$                              | Effect size of alleles coding for plasticity                                                                                     |
| $s$                                  | Selection per locus for loci underlying the non-plastic<br>component of the phenotype, $s = \alpha^2 / (2V_S)$                   |
| $\sigma$                             | Standard deviation of Gaussian dispersal function                                                                                |

178 We assumed that the phenotype,  $u_{\tau,k}^{(i)}$ , of the trait under selection for indi-  
 vidual  $k$  in deme  $i$  in generation  $\tau$  was equal to the sum of a non-plastic and a

plastic component

$$u_{\tau,k}^{(i)} = z_{\tau,k}^{(i)} + g_{\tau,k}^{(i)} \theta_{\tau}^{(i)} \quad (1)$$

where  $z_{\tau,k}^{(i)}$  denotes the non-plastic component and  $g_{\tau,k}^{(i)}$  denotes the magnitude of the individual's plastic response relative to the local phenotypic optimum (hereafter referred to as *plasticity*). The full plastic component of the phenotype was assumed to be equal to  $g_{\tau,k}^{(i)} \theta_{\tau}^{(i)}$ , reflecting a common assumption (e.g., [24, 25]) that the same environmental variable determines both the plastic response and the optimal phenotype. For simplicity, we use  $\theta_{\tau}^{(i)}$  to denote both the optimal phenotype and the environmental cue that affects the plastic response. Note that  $\bar{\theta}^{(i)}$  was zero in the centre of the habitat, hence plasticity had, on average (i.e., ignoring the temporal fluctuations), no effect on the average phenotype there. This setting corresponds to treating the centre of the habitat (which is the source of expansion in the model) as the *reference environment* for the plastic response [38]. Note that equation (1) corresponds to equation (2) in [25] in the special case when the reference environment,  $g_2$ , in the notation from [25], is zero.

In our model, the non-plastic component of the phenotype,  $z_{\tau,k}^{(i)}$ , and plasticity  $g_{\tau,k}^{(i)}$ , were each underlain by  $L$  freely recombining bi-allelic loci with additive allele effects, that is, in total there were  $2L$  loci under selection (but we also performed simulations where the number of loci for the plastic and non-plastic component were different; Appendix C). The two possible allele effect sizes for the loci underlying  $z_{\tau,k}^{(i)}$  were  $\pm\alpha/2$  with  $\alpha = \frac{\bar{\theta}^{(M)}}{L}$  so that in the absence of plasticity (i.e., when  $g_{\tau,k}^{(i)} = 0$ ), the  $L$  loci underlying  $z_{\tau,k}^{(i)}$  were just enough to constitute the average minimal and maximal optimal phenotypes in the habitat, i.e., the optima at the habitat edges (analogously to [40]). The two possible allele effect sizes for the loci underlying  $g_{\tau,k}^{(i)}$  were  $\pm\beta/2$  with  $\beta = 2/L$  so that  $g_{\tau,k}^{(i)}$  was between  $-2$  and  $2$ . In a special case when  $g_{\tau,k}^{(i)} = 1$  and  $z_{\tau,k}^{(i)} = 0$ , it follows that  $u_{\tau,k}^{(i)} = \theta_{\tau}^{(i)}$ . Noting that the optimal phenotype in the source of the expansion is, on average, zero, we refer to plasticity of one (i.e.,  $g_{\tau,k}^{(i)} = 1$ ) as *perfect plasticity*, because it allows perfect adaptation everywhere without any evolution of the non-plastic component with respect to the source of the expansion.

Apart from assuming that plasticity had a polygenic basis, we also allowed it to be potentially costly. Namely, we modelled the fitness  $W_{\tau,k}^{(i)}$  of individual  $k$  in deme  $i$  in generation  $\tau$  as

$$W_{\tau,k}^{(i)} = 2 \exp(r_{\tau,k}^{(i)}) C_{\gamma}(g_{\tau,k}^{(i)}, \delta). \quad (2)$$

In equation (2), the factor 2 is included due to diploidy,  $r_{\tau,k}^{(i)}$  is the growth rate and  $C_{\gamma}(g_{\tau,k}^{(i)}, \delta)$  is a cost-related function accounting for a maintenance cost of plasticity (*sensu* [33]), such that costs are larger when  $C_{\gamma}(g_{\tau,k}^{(i)}, \delta)$  is smaller, and *vice versa*. These components are further explained next.

The growth rate,  $r_{\tau,k}^{(i)}$ , was assumed to be given by

$$r_{\tau,k}^{(i)} = r_m \left( 1 - \frac{N_{\tau}^{(i)}}{K} \right) - \frac{(u_{\tau,k}^{(i)} - \theta_{\tau}^{(i)})^2}{2V_S}. \quad (3)$$

Here,  $V_S$  denotes the width of stabilizing selection and we assumed throughout that  $V_S = 2$ . Furthermore,  $r_m$  denotes the maximal intrinsic growth rate and it was set to  $r_m = 1$  in our simulations. Finally,  $N_{\tau}^{(i)}$  denotes the population size in deme  $i$  in generation  $\tau$ , and  $u_{\tau,k}^{(i)}$  denotes the phenotype, given by equation (1). Note that when  $g_{\tau,k}^{(i)} = 0$  and  $\sigma_{\theta} = 0$ , the model reduces to the one considered in [40]. Our model did not contain any residual component of phenotypic variance caused by environmental factors in addition to the variability in  $\theta_{\tau}^{(i)}$ .

We assumed that  $C_{\gamma}(g_{\tau,k}^{(i)}, \delta)$  is a decreasing function of the absolute value of plasticity  $|g_{\tau,k}^{(i)}|$  (similarly as in [25]), that is:

$$C_{\gamma}(g_{\tau,k}^{(i)}, \delta) = (1 - \delta |g_{\tau,k}^{(i)}|)^{\gamma}. \quad (4)$$

In equation (4),  $\delta$  and  $\gamma$  are non-negative parameters, assumed to be constant over time and the same for all individuals. The parameter  $\delta$  determines the threshold plasticity above which the maximal fitness of an individual is non-positive. When  $|g_{\tau,k}^{(i)}| = 1/\delta$ , it follows that  $C_{\gamma}(g_{\tau,k}^{(i)}, \delta) = 0$ , and hence  $W_{\tau,k}^{(i)} = 0$ . To avoid occurrences of negative fitness, we define  $W_{\tau,k}^{(i)} = 0$  when  $|g_{\tau,k}^{(i)}| \geq 1/\delta$ . Conversely, the parameter  $\gamma$  is a shape parameter, determining whether plasticity costs are more sensitive to high or low plasticity. When  $\delta = 0$  and/or  $\gamma = 0$ , it follows that  $C_{\gamma}(g_{\tau,k}^{(i)}, \delta) = 1$ , and thus there is no cost of plasticity. The cost of plasticity increases with increasing  $\delta$  and/or  $\gamma$  (keeping  $g_{\tau,k}^{(i)}$  constant). A graphical illustration of the cost-related function  $C_{\gamma}(g_{\tau,k}^{(i)}, \delta)$  for  $\gamma = 1$  and  $\gamma = 0.5$  is shown in figure A2 in Appendix A.

The life cycle of individuals was modelled as follows. First, each individual contributed a random number of gametes sampled from a Poisson distribution with mean  $W_{\tau,k}^{(i)}$  (equation (2)). Plasticity was expressed during the adult life stage in the same environment where the individuals mated. Recombination occurred independently for each gamete, with free recombination between all loci. Second, at each locus mutation occurred reversibly and symmetrically between the two possible alleles with probability  $\mu = 10^{-6}$  per allele, per gamete, per generation. Third, pairs of gametes were chosen uniformly at random to form zygotes (thus, selfing was possible). Finally, the parents were removed and the zygotes dispersed according to a Gaussian function with mean 0 and standard deviation  $\sigma = 1$ , as described in [40]. After migration, zygotes were treated as adults.

At the start of each simulation, a fraction of the habitat was occupied, and we initialised genotypes in such a way that the average phenotype of the population followed the local optimum in the occupied demes and all individuals initially had plasticity of zero (Appendix A). Consequently, the (narrow-sense)



258 heritability [42] of the phenotype was initially set to 1 because the total pheno-  
typic variance was governed entirely by the genetic variance of the non-plastic  
260 component. However, during the course of simulations, the heritability evolved  
and potentially varied throughout the range (when plasticity varied spatially),  
attaining small values when plasticity was large.

262 After initialising the starting genotypes, we simulated a burn-in period of  
100,000 generations in the source population before we allowed expansion over  
264 the empty demes. The burn-in period allowed us to initiate range expansion  
from an old source population. During the burn-in period the source population  
266 stabilised under migration, selection, mutations, drift and possible interactions  
between the plastic and non-plastic component of the phenotype. This reduced  
268 the impact of our choice regarding the starting genotypes (described in Ap-  
pendix A) on the follow-up dynamics of range expansion.

270 During the burn-in period, the population was restricted to  $M/5$  demes in  
the centre of the habitat. The boundaries were reflecting, that is, individuals  
272 remained at boundary demes instead of dispersing out of the initial range. Note  
that the number of migrants reaching the boundaries was finite in every gener-  
274 ation because all demes have a finite number of individuals prior to migration,  
and dispersal distance is relatively small ( $\sigma = 1$ ).

276 After the burn-in, the population was allowed to expand its range for ad-  
ditional 100,000 generations (or 200,000 generations in some cases; Appendix  
278 A). As during the burn-in period, the habitat had reflecting boundaries.

280 We examined different parameter sets, chosen to below, close to, or above  
the critical cost of plasticity derived in Appendix B (table A1, Appendix A).

282 For each deme, we recorded the population size, the average non-plastic com-  
ponent, the average plasticity, and the genetic variance every 200 generations.  
The genotype of each individual was recorded at the end of the simulations and  
284 at the end of the burn-in period. We performed 100 independent realisations  
for each parameter set (unless stated otherwise).

286 Apart from performing simulations, we analytically estimated plasticity that  
maximises the mean population fitness locally (i.e., the *optimal plasticity*; Ap-  
288 pendix B). Notably, we derived approximate conditions for when a population  
with the capacity for plasticity is expected to attain a larger range than a pop-  
290 ulation lacking this capacity.



## 3 Results

### 3.1 Analytical approximation of the optimal plasticity and the critical cost of plasticity

To derive the conditions allowing plasticity to evolve during range expansion over a gradually steepening environmental gradient, we have undertaken the following steps. First, we found that a locally optimal plasticity,  $g_e$  (i.e., plasticity that maximises the local mean population growth rate in equilibrium) in a temporally static environments with a given local environmental gradient  $b(x)$  is given by:

$$g_e^*(x) = \begin{cases} 0, & \text{for } \frac{1}{\delta} - \frac{2\gamma\sqrt{V_S}}{\sigma b(x)} \leq 0, \\ 1, & \text{for } \frac{1}{\delta} - \frac{2\gamma\sqrt{V_S}}{\sigma b(x)} \geq 1, \\ \frac{1}{\delta} - \frac{2\gamma\sqrt{V_S}}{\sigma b(x)}, & \text{for } 0 < \frac{1}{\delta} - \frac{2\gamma\sqrt{V_S}}{\sigma b(x)} < 1. \end{cases} \quad (5)$$

In temporally fluctuating environments, the optimal plasticity is typically larger than in temporally static environments (equation (B41)). Here we explain the implications of the optimal plasticity in the case of static environments, for simplicity, but the same arguments apply to temporally fluctuating environments.

Using equation (5), we found a critical environmental gradient (hereafter called the *critical plasticity gradient*), below which the optimal plasticity is zero (i.e. when  $b(x) \leq 2\gamma\delta\sqrt{V_S}/\sigma$ ). That is, below the critical plasticity gradient any potential positive plasticity that may evolve during initial phases of range expansion is transient, and will eventually vanish.

Next, we made use of the critical plasticity gradient to deduce the conditions allowing a population expanding its range over a gradually steepening gradient to utilise plasticity. Recall that, for a population without the capacity for plasticity, local adaptation is expected to fail at a critical environmental gradient [11] (hereafter *critical genetic gradient*, to emphasise that it corresponds to the case where plasticity is absent). We conclude that when the critical genetic gradient is smaller than the critical plasticity gradient, local adaptation for a population with the capacity for plasticity fails under the same conditions as for a population lacking the capacity for plasticity.

More generally, we show that there are three different regimes for the range margins (figure 1) with respect to two compound parameters, that is  $\gamma\delta/r_m$  and  $K\sigma\sqrt{s}$  (table 1). The three different regimes are: no difference in the range compared to when the population does not have the capacity for plasticity (this regime, hereafter denoted by  $R_0$ , is discussed above and corresponds to the white region in figure 1); a larger, but finite, range than when the population does not have the capacity for plasticity (grey region in figure 1, above dashed line; hereafter denoted by  $R_1$ ); and potentially infinite range (figure 1, below dashed line; hereafter denoted by  $R_2$ ).

Finally, we found a critical cost of plasticity ( $\delta_c$ ) below which the critical genetic gradient is larger than the critical plasticity gradient. In other words, the critical cost of plasticity is the smallest cost of plasticity for which the

dynamics of range expansion fall within regime  $R_0$ . The critical cost of plasticity, generalised to account for temporal fluctuations of environmental conditions (Appendix B), is given by

$$\delta_c = \frac{1}{\gamma} \left( r_m \frac{2A + 2 - AF - \sqrt{4 + 8A + 4AF + A^2F}}{2A} + \frac{\sigma_\theta^2}{\sigma_\theta^2 + V_S} \right). \quad (6)$$

Here,  $A = 0.3\sqrt{2}K\sigma\sqrt{s}$  and  $F = -\ln[\sqrt{V_S}/(\sigma_\theta^2 + V_S)]$  (for notations see table 1). The critical cost (equation (6)), separates the white region from the grey in figure 1.

Outside of the parameter region where regime  $R_0$  is realised, i.e., when the cost of plasticity is lower than the critical cost, the equilibrium range of the population is expected to be larger than for a population without the capacity for plasticity. Here, the equilibrium range is either finite, but larger than for a population without the capacity for plasticity ( $R_1$ ) or it is possibly infinite ( $R_2$ ; note that regime  $R_2$  accounts for cases where unlimited ranges occur, but this may not happen for all parameters belonging to regime  $R_2$ , as we discuss next).

We distinguished regimes  $R_1$  and  $R_2$  using a necessary but not sufficient condition for unlimited range expansion (dashed line in figure 1), namely that the cost of plasticity is both lower than the critical cost  $\delta_c$ , and sufficiently low to allow a positive population growth rate with plasticity of 1 (hereafter *perfect plasticity*; Appendix B).

We did not determine the precise conditions allowing unlimited range expansion. However, this is expected at least when there is no cost of plasticity (equations (1)-(3)). We used simulations to examine several parameter sets belonging to regime  $R_2$ , focusing on cases with positive plasticity costs.

## 3.2 Simulation results

For comparison, we first ran simulations without plasticity (figure C1). In simulations without plasticity and with static environmental conditions ( $\sigma_\theta^2 = 0$ ), range margins established at the critical genetic gradient (figure C1A), as expected. By contrast, temporal fluctuations in the optimal phenotype (in the absence of plasticity) reduced the range by reducing the equilibrium population size by approximately  $\ln(\sqrt{V_S}/(V_S + \sigma_\theta^2))/r_m$  in agreement with [43, 44] (figure C1 B-D; Appendix B). Next, we present simulation results with plasticity.

### 3.2.1 Temporally static environmental conditions

Recall that our simulations were initialised with a burn-in period. When there were no temporal fluctuations in the environmental conditions, the average plasticity at the end of the burn-in period was close to zero (figure C2). As a consequence, the starting genotype for the non-plastic component was essentially the same as without plasticity (figure C3). Although most alleles for plasticity were fixed, some loci were polymorphic (figure C4).

After the burn-in period, we found that when the cost of plasticity was higher than the critical cost  $\delta_c$  (so that the expected range expansion dynamics was

within regime  $R_0$ ), plasticity was very low ( $< 0.05$ ), and the final range agreed  
372 with the expected range for populations without the capacity for plasticity (fig-  
ure 2 A, figures C5 A-B, C6 A-B). This finding was retained when the cost of  
374 plasticity was close to the critical cost (figures C5 C and C6 C).

Conversely, when the cost of plasticity was lower than the critical cost, but  
376 sufficiently high to prevent a population with perfect plasticity to have a positive  
growth rate (i.e., parameters within the expected regime  $R_1$ ), we observed a  
378 higher plasticity in the edges and a slightly larger range than when the cost was  
above the critical cost (figure 2 B). For a more concave cost-related function, the  
380 difference between the ranges attained in regime  $R_0$  and  $R_1$  was larger (compare  
figure C7 to figure 2 B).

By contrast, when the cost of plasticity was both lower than the critical  
382 cost and sufficiently low to allow a population with perfect plasticity to have  
a positive growth rate, the entire habitat was colonised (figures 2 C, C5 D, C6  
384 D).

Recall that our analytical results (equation (5)) shows that selection favours  
386 fully non-plastic (plastic) phenotypes in shallow (steep) environmental gradi-  
ents. This is in agreement with our simulations (red lines in the bottom panels  
388 in figure 2). Regardless of the cost, during the entire simulated time-span,  
390 plasticity remained close to zero in the centre of the habitat, where the environ-  
mental gradient is shallow. In the edges of the range, plasticity was higher than  
392 in the centre of the range. Furthermore, plasticity in the range edges was higher  
for parameter combination within regime  $R_1$  than for parameter combinations  
394 within regime  $R_0$  (average plasticity was 0.02 in figure 2 A, in comparison to  
0.1 and 0.7 in figure 2 B and C7 A, respectively). For parameters in regime  $R_2$ ,  
396 the entire habitat was populated and plasticity was close to 1 at the habitat  
edges (0.95 on average in the case shown in figure 2 C).

The spatial pattern of allele frequencies for the non-plastic component of the  
398 phenotype consisted of a series of staggered clines with the same average width  
as expected for a population without the capacity for plasticity (figure C8).  
400 However, when non-zero plasticity evolved, the spacing between the clines was  
larger than it would have been in the absence of plasticity (e.g. note the absence  
402 of clines between deme 10 and deme 50 in figure C8 A, and compare to figure C8  
C and E). This is expected by the analogy with [10] (*albeit* in a model without  
404 plasticity) because plasticity  $g$  effectively reduces the environmental gradient  
by a factor of  $1 - g$  [23]. Thus, the spacing between the clines is expected  
406 to be increased by a factor of  $1/(1 - g)$ . For the loci underlying plasticity,  
408 allele frequencies increased in a cline-like manner towards the habitat edges for  
parameters within regime  $R_2$  (figure C8 B) and regime  $R_1$  (figure C8 D). By  
410 contrast, when no plasticity evolved, no clear spatial pattern in allele frequencies  
emerged for the loci underlying plasticity (figure C8 E).

### 412 3.2.2 Temporally fluctuating environmental conditions

When the model included temporal fluctuations in the optimal phenotype, re-  
414 sults similar to those for static environmental conditions were obtained at the

416 end of the burn-in period when the cost of plasticity was above the critical cost (figure C9 A, B, and D). But, positive plasticity evolved during the burn-in  
418 period when the cost of plasticity was low (figure C9 C, E, F, G, H, and I). These results are in agreement with equation (B41) (and see [45]). The spa-  
420 tial patterns of allele frequencies for the non-plastic component at the end of the burn-in period were more noisy than under temporally static environmental  
422 conditions (compare figure C10 to figure C3). As for temporally static envi-  
424 ronmental conditions, the spatial pattern of allele frequencies for the plastic  
426 component were irregular (figure C11).

424 After the burn-in period, when the population was allowed to expand its  
426 range, no plasticity evolved when the cost of plasticity was larger than the  
428 critical cost (figures 3 A; C12 A, C, and E; C13 A, C, and E), similarly to when  
430 the environment was static. In addition, the population size and range extent  
432 attained at the end of our simulations were the same as for a population without  
434 the capacity for plasticity (compare figure C1 B to figure C13 A; figure C1 C to  
436 figure C13 C; and figure C1 D to figure C13 E). Conversely, and similarly to the  
438 case with static environmental conditions, when the cost of plasticity was below  
440 the critical cost, positive plasticity evolved. For parameters within regime  $R_1$ ,  
442 as expected, the range was larger than in the absence of plasticity, but smaller  
444 than the size of the available habitat (figure 3 B). Conversely, for parameters  
446 within regime  $R_2$  very high plasticity evolved (on average, 0.95 at the habitat  
448 edges in the case shown in figure 3 C) and range expansion continued all the  
450 way to the edges of the habitat (figure 3 C; see also figure C12 B, D, F, and  
figure C13 B, D, F).

In contrast to the results with temporally static environments, plasticity  
440 in the centre of the habitat was close to zero only when the cost of plasticity  
442 was high (red lines in the bottom panels of figure 3 A-B and in figure C13 A,  
444 C, E), and it was well above zero in the other cases (red lines in the bottom  
446 panel of figure 3 C and in figure C13 B, D, F). Thus, a gradient in plasticity at  
448 the end of our simulations was shallower with temporally fluctuating than with  
450 temporally static conditions (compare figure 2 C to figure 3 C). Interestingly, at  
the end of our simulations with temporally fluctuating environmental conditions,  
plasticity in the centre of the habitat was higher than at the end of the burn-in  
period (compare, for example, figure C9 C to figure 3 C), and higher than the  
optimal plasticity given by our approximation (B41). This resulted in a lower  
population size in the centre of the habitat than the population size expected  
for a population without plasticity.

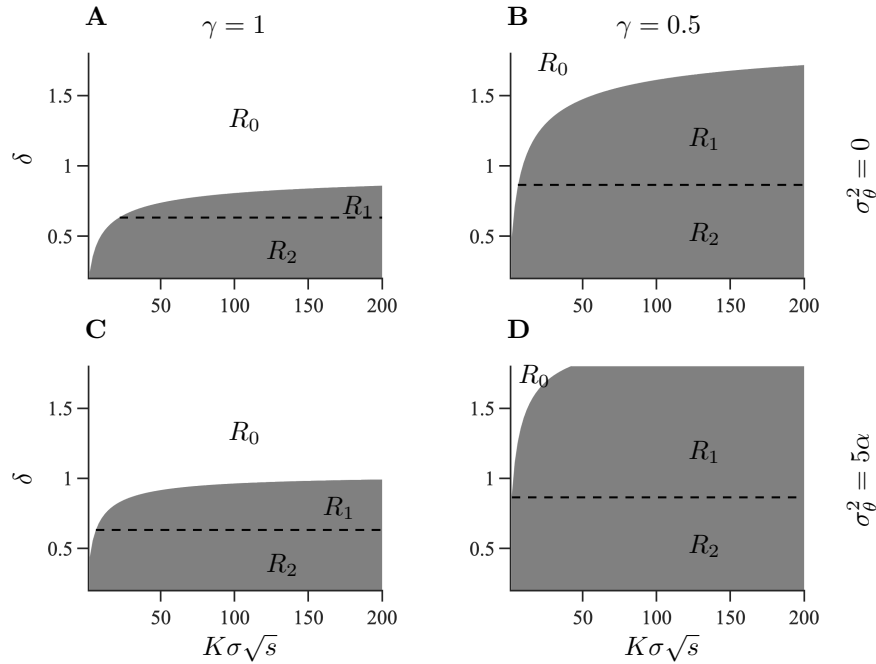

Figure 1: For a given variance of temporal fluctuations in the optimal phenotype, the cost of plasticity divides the parameter space, consisting of the two compound parameters  $K\sigma\sqrt{s}$  and  $\gamma\delta/r_m$ , into three regimes,  $R_0$ ,  $R_1$  and  $R_2$ . In regime  $R_0$  (shown in white), range margins form under the same conditions as without plasticity. In regimes  $R_1$  and  $R_2$  (shown in grey), the range is larger than without plasticity. The dashed line corresponds to a maximum mean population growth rate of zero when the mean phenotype is at the optimum and plasticity equals one. Above the dashed line, in regime  $R_1$ , the equilibrium range is finite. In regime  $R_2$  (below the dashed line in the grey area) the growth rate of the population is positive for plasticity of 1. Left column: regimes for a linear cost-related function. Right column: regimes for a concave cost-related function ( $\gamma = 0.5$ ). Upper row: regimes for a temporally static environment. Lower row: regimes for temporally fluctuating environment where  $\sigma_\theta^2 = 5\alpha$  (with  $\alpha = 1/\sqrt{10}$ ).

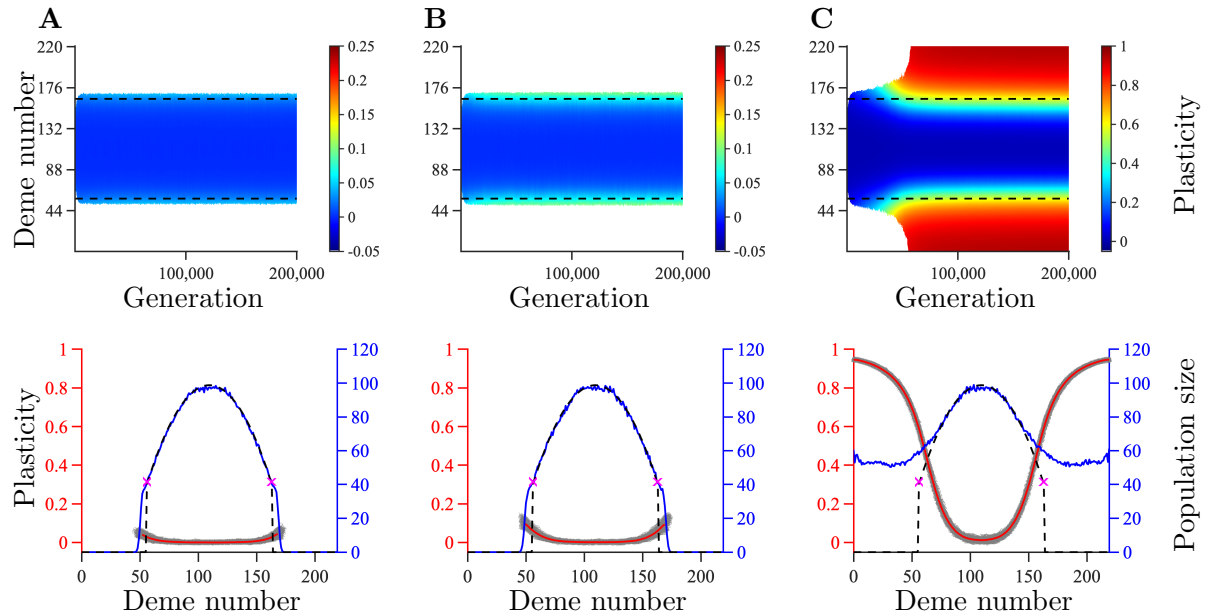

Figure 2: The upper panels show the temporal and spatial evolution of plasticity averaged over 100 realisations during range expansion in a habitat with temporally static environmental conditions. The range expansion dynamics is expected to fall within regime  $R_0$  (column A),  $R_1$  (column B), or  $R_2$  (column C). The columns differ by the parameter  $\delta$ :  $\delta = 1.3$  (A),  $\delta = 0.9$  (B),  $\delta = 0.5$  (C). The red lines in the bottom panels show plasticity averaged over 100 realisations (red axis on the left), the grey areas indicate the spread of plasticity between different realisations. The blue lines show the population size, averaged over 100 realisations (blue axis on the right). The dashed lines in the upper panels denote where adaptation is expected to fail for a population without plasticity. The dashed lines in the lower panels show the expected population size in the absence of plasticity and the purple crosses indicate the expected failure of adaptation. Remaining parameters:  $K = 100$ ,  $r_m = 1$ ,  $V_S = 2$ ,  $\mu = 10^{-6}$ ,  $\sigma = 1$ ,  $L = 799$ ,  $\alpha = 0.3162$ ,  $\beta = 0.0013$ ,  $\gamma = 0.5$  and  $\sigma_\theta = 0$ .

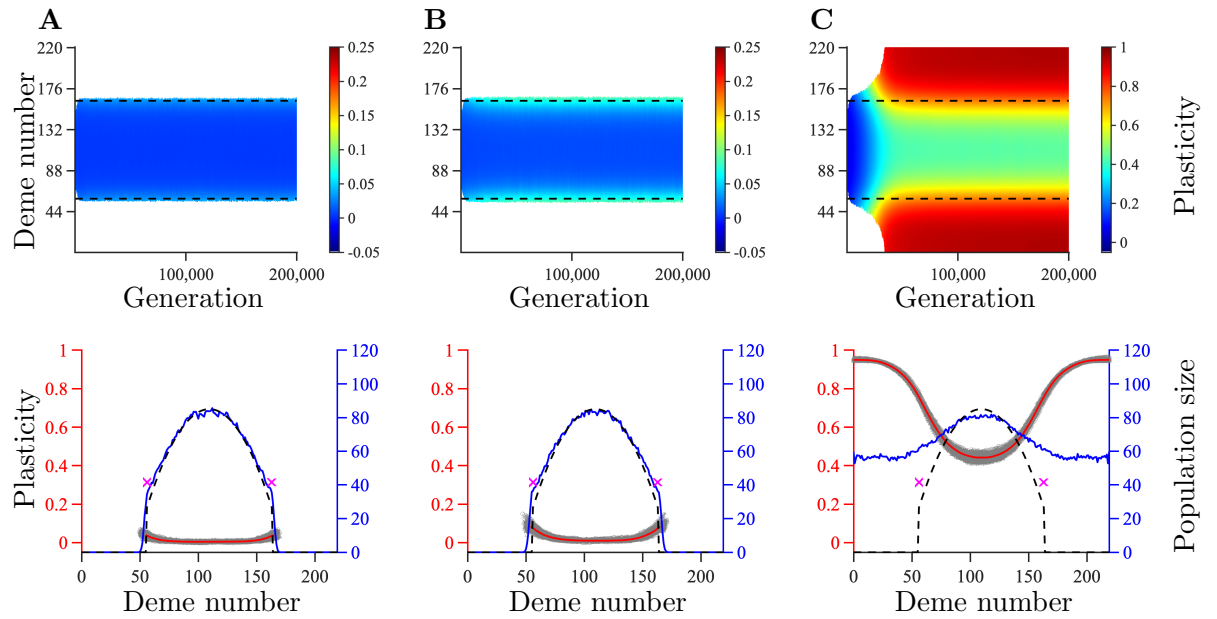

Figure 3: The columns show the results corresponding to those in figure 2 but for temporally fluctuating environmental conditions ( $\sigma_\theta = \sqrt{2\alpha}$ ). For the parameter values used (apart from  $\sigma_\theta$ ), refer to the caption of figure 2. The dashed lines in the upper panels denote where adaptation is expected to fail (when  $\sigma_\theta = \sqrt{2\alpha}$ ) for a population without plasticity. The dashed lines in the lower panels show the expected population size with temporally fluctuating environmental conditions for a population without plasticity. Remaining parameters:  $K = 100$ ,  $r_m = 1$ ,  $V_S = 2$ ,  $\mu = 10^{-6}$ ,  $\sigma = 1$ ,  $L = 799$ ,  $\alpha = 0.3162$ ,  $\beta = 0.0013$ , and  $\gamma = 0.5$ .



## 452 4 Discussion

Plasticity may facilitate local adaptation to variable and marginal environments, as demonstrated empirically (e.g., [46, 47]), and theoretically (e.g., [9, 23, 24, 25, 35, 38, 48, 45]). However, in some cases the impact of plasticity on local adaptation may be weak or nonexistent (e.g., [15, 26, 32, 49]). The extent to which plasticity is involved in local adaptation may impact on the evolution of species' ranges and range margins. However, theoretical understanding of the role of plasticity in the establishment of range margins was limited to situations in which genetic variance is an (arbitrarily) fixed, rather than an evolving, property of a population [9] (but see [25]). Importantly, studies of range expansion in the absence of plasticity [8, 10, 11] have shown that genetic variance is a key factor involved in the establishment of range margins. Indeed, fixed genetic variance can cause non-trivial range margins to establish (giving rise to finite ranges, smaller than the size of the available habitat), whereas evolving genetic variance, under otherwise the same model conditions, can allow unlimited range expansion [10]. This suggests that allowing genetic variance to evolve, instead of keeping it fixed, may alter the role of plasticity in the establishment of range margins, both qualitatively and quantitatively. This is the focus of our study. We are primarily interested in situations where populations without plasticity attain non-trivial range margins, such as range expansions over gradually steepening spatial environmental gradients, either without or with temporal fluctuations.

### 474 4.1 When does the capacity for plasticity increase the range of a population?

Our main result is that plasticity may be involved in the establishment of range margins in one of the following three qualitatively different ways: i) no effect of plasticity, ii) plasticity increases the range by a finite amount, or iii) plasticity allows for unlimited ranges (i.e., absence of non-trivial range margins). Which of these possibilities is realised depends on the benefits of plasticity relative to its costs. Notably, we found a critical cost of plasticity,  $\delta_c$ , above which plasticity does not evolve and the population (despite the capacity for plasticity) is expected to attain the same range as a population lacking the capacity for a plastic response. Below this cost, the range of the population is wider than the range of a population that lacks the capacity for plasticity. Interestingly, the critical plasticity cost is smaller in temporally fluctuating than in static environments, in agreement with [45]. Furthermore, we found a second (smaller) critical cost (hereafter *threshold cost*) below which the range may be infinite (or constrained by a finite habitat size).

When the cost of plasticity is above the critical cost  $\delta_c$ , in local populations up to and beyond the critical genetic gradient (found in [11]), fitness is maximised when plasticity is zero. As a consequence, above the critical plasticity cost, the equilibrium range of a population with the capacity for plasticity coincides with the range of a population lacking this capacity. This is confirmed

by our simulation results. Throughout the range, local plasticity was zero on  
496 average, except in local populations in the close vicinity of the range margins  
where slightly positive plasticity evolved. This is expected because marginal  
498 populations are demographic sinks (*sensu* [50]). Here, a strongly positive feed-  
back between local maladaptation and small local population size increases local  
500 selection for plasticity [9]. Importantly, however, this effect is weak above the  
critical plasticity cost, making plasticity ineffective to increase the range beyond  
502 the range expected in the absence of plasticity.

By contrast, when the cost of plasticity is below  $\delta_c$ , positive plasticity is  
504 optimal below the critical genetic gradient. This allows positive plasticity to  
evolve and be maintained in local populations. In turn, positive plasticity re-  
506 duces local maladaptation, as well as local selection gradient (as also suggested  
in [23]), thus making it possible for a population to expand beyond the range  
508 expected in the absence of plasticity (i.e., beyond the critical genetic gradient).  
Interestingly, when the cost of plasticity is so low that the population may si-  
510 multaneously express perfect plasticity and have a positive growth rate (i.e.,  
below the threshold cost we found), there may be no limit to range expansion  
512 (but note that the threshold cost corresponds to a necessary, but not sufficient  
condition for infinite range expansion to occur). While we were not able to  
514 formally prove that infinite range expansion occurs when plasticity costs are  
sufficiently small, but positive (note that zero costs trivially result in infinite  
516 range expansion, as also pointed out in [9], and see references therein), our  
simulations with non-zero plasticity costs below the threshold cost confirmed  
518 that the population occupied the entire habitat (which is necessarily finite in  
simulations), and that large plasticity evolved (close to 1 at the habitat edges).

Conversely, when the cost of plasticity is below  $\delta_c$ , but still so large that  
520 a population with perfect plasticity cannot have a positive growth rate (i.e.,  
above the threshold cost), the capacity for plasticity leads to a range that is  
522 finite but larger than when plasticity is absent. Notably, the width of the  
parameter region where this regime is realised (i.e., between the critical and the  
524 threshold cost) is governed by the concavity of the cost function. The more  
strongly concave the cost function is, the wider is the regime where plasticity  
526 leads to finite but larger ranges than when plasticity is absent. For linear or  
convex cost functions, this regime is very narrow and almost nonexistent for  
528 biologically plausible parameters. Consequently, in populations with linear or  
convex plasticity cost functions, plasticity in equilibrium tends to be either  
530 zero throughout the range of the population, or the population may expand its  
range without limits. We discuss the consequences of this finding in the next  
532 subsection.

Recall that we assumed a gradually steepening spatial environmental gra-  
534 dient. Under this assumption, we found a spatial gradient in plasticity when  
the cost of plasticity was below  $\delta_c$ . This is similar to the pattern found in e.g.,  
536 [9, 23]. However, in those studies, genetic variance was fixed. Consequently, in  
[9, 23] the mean population phenotype deviated more from the local optimum  
538 further away from the core habitat, resulting in an increased selection for plas-  
ticity away from the core habitat. In our model, by contrast, genetic variance is  
540

542 allowed to evolve, meaning that the mean population phenotype in populated  
543 areas matches the (average) optimal phenotype. Here, maladaptation is due to  
544 genetic variance that increases as the environmental gradient steepens. This  
545 increase in genetic variance is further reflected in a progressively decreasing  
546 realised population size (although all demes had the same carrying capacity).  
547 Thus, in our model, genetic variance increases as the distance from the core  
548 population increases, and this results in stronger selection for plasticity. How-  
549 ever, we note that the plasticity gradient occurs only below the critical plasticity  
550 cost.

551 Furthermore, in a range-expansion model with environmental conditions that  
552 change linearly in space (i.e., with a constant rather than a steepening gradi-  
553 ent), and with evolving genetic variance, it was argued that a spatial gradient  
554 in plasticity levels out in the long run [25]. To verify this, we performed range  
555 expansion simulations along an environment that changes linearly in space (fig-  
556 ure C14). We noted a small increase in plasticity towards the habitat edges.  
557 This probably reflects edge effects caused by the number of loci we used in  
558 simulations (this effect is likely to decrease upon increasing the number of loci,  
559 but we did not test this further). However, and as expected, we found that  
560 the gradient in plasticity was much shallower when the environmental gradient  
561 was constant (figure C14) than when it was steepening (figure 2 C). This is in  
562 good agreement with our analysis showing that local plasticity depends on local  
563 environmental gradient.

564 Finally, in our simulations plasticity evolved slower during range expansion  
565 than the non-plastic component of the phenotype. This is both due to the steep-  
566 ening environmental gradient, which was shallow in the centre of the habitat,  
567 and due to the relatively small allele effect sizes at loci underlying plasticity. By  
568 contrast, plasticity evolved much faster in [25], where the environment changed  
569 linearly in space and fewer loci were underlying plasticity (so that the allele  
570 effect sizes at loci underlying plasticity were larger). Indeed, in our simulations  
571 with larger allele effect sizes at loci underlying plasticity (figure C15), or with a  
572 constant, rather than steepening, environmental gradient (figure C14), plasticity  
573 evolved faster.

## 574 4.2 Plasticity costs: empirical data and a lesson from theory

575 We have analytically re-derived the theoretically well-known result that in the  
576 absence of costs, perfect plasticity will eventually evolve [9, 51], and the popula-  
577 tion would be able to expand its range infinitely. The existence of finite ranges  
578 even in the absence of any evident geographical barriers [6, 7], thus, suggests  
579 that some limits or costs of plasticity may be involved [33]. However, empirical  
580 evidence for plasticity costs have so far been elusive [34, 52, 53], except for a  
581 few special cases, such as learning-ability [53]. Our results imply that finding  
582 empirical evidence for plasticity costs may be specifically difficult when cost  
583 functions are much more sensitive to high values of plasticity than to low values  
584 (i.e., when cost functions are concave). This is because plasticity would be only

586 weakly costly when plasticity is low or moderate. However, plasticity would still  
587 be limited, because high plasticity would exert high costs potentially causing  
588 a local population to shrink in size (see discussion above). Thus, concave cost  
589 functions of plasticity may potentially limit plasticity while rendering costs dif-  
590 ficult to detect. Based on this, we speculate that plasticity costs are more likely  
591 to be concave than convex in natural populations, but this is yet to be formally  
592 demonstrated.

592 We note that our results are based on the assumption that the cost of plas-  
593 ticity is constant over space and time. If plasticity costs can evolve, they may  
594 decrease over time. However, whether the costs of plasticity will eventually  
595 vanish remains an open question for future work.

### 596 **4.3 Limitations of the model**

597 The impact of plasticity on local adaptation may be limited by unreliable envi-  
598 ronmental cues [54, 55, 56]. Because plasticity may be expressed during different  
599 life stages of an organism [57], a mismatch between the environment experienced  
600 during development of the plastic response and the environment experienced  
601 during selection can occur [33]. In this case, high plasticity during the ju-  
602 venile life stage may produce a population that is overfitted to the temporal  
603 environment, and hence ill adapted to future fluctuations in the environmental  
604 conditions. It has been shown both theoretically [38, 45, 48, 54, 55, 56, 58] and  
605 empirically [59] that this may impede the evolution of plasticity. Note, how-  
606 ever, that the expression of plasticity may occur once during a short critical  
607 life-stage or reversibly throughout the life of an individual [60, 61]. The cost of  
608 unpredictable cues may be less pronounced for reversible plasticity (compared  
609 to when plasticity is irreversible), but this depends on the cost for producing  
610 the plastic responses, if such costs are present [58]. In our model, we assumed  
611 that the environment of development was perceived without noise and that it  
612 was the same as the environment of selection. We leave for future studies to  
613 investigate how unreliable cues contribute to the formation of range margins.

614 Recall that we assumed that all loci recombine freely. Thus, we did not  
615 explore the effect of reduced recombination between the loci underlying the  
616 non-plastic and/or the plastic component of the phenotype. Dispersal in a spa-  
617 tially heterogeneous environment generates linkage disequilibria between loci,  
618 which may lead to maladaptive associations between alleles. This may, in turn,  
619 promote the evolution of increased recombination [62]. However, the opposite  
620 may be true in marginal habitats [40, 63, 64]. Indeed, locally beneficial combi-  
621 nations of alleles may be partially protected from maladaptive gene flow if the  
622 recombination rate between adaptive loci is low. This may allow populations to  
623 persist along environmental gradients steeper than the critical genetic gradient  
624 [40]. Reaching gradients above the critical genetic gradient may allow the pop-  
625 ulation to evolve plasticity even when its cost is above the critical cost. Hence,  
626 reduced recombination may potentially allow the evolution of higher plasticity  
627 in the range margins than when recombination between the adaptive loci is free.  
628 However, reduced recombination between loci underlying plasticity and loci un-

derlying non-plastic local genetic adaptation may cause trade-offs that limit the  
630 utility of plasticity [65]. Additionally, reduced recombination may possibly lead  
to more frequent evolution of maladaptive plasticity due to poor purging of alle-  
632 les coding for maladaptive plasticity. We leave for further studies to investigate  
the role of recombination in the evolution of plasticity, and how recombination  
634 and plasticity interact to form range margins.

#### 4.4 Applications to conservation

636 It is well-known that ongoing global climate change is expected to cause direc-  
tional changes in environmental conditions [66]. However, climate change  
638 also be reflected in stronger temporal fluctuations of environmental conditions  
in many areas [67]. Management and conservation efforts aimed at mitigat-  
640 ing the impact of global climate change should therefore include knowledge  
and predictions on how temporal fluctuations affect the evolution of natural  
642 populations. Specifically, we found that unpredictable conditions may lead to  
decreased ranges of populations that lack the capacity for plasticity for the trait  
644 under selection, or for which the capacity for plasticity in the trait under se-  
lection is too costly. By contrast, the ranges of populations that have capacity  
646 for plasticity with a sufficiently low cost may not suffer any adverse effect from  
environmental fluctuations (unless the correlation between the environment of  
648 development and the environment of selection is weak, as discussed above, or the  
fluctuations are so strong that the population goes extinct before it can evolve  
650 sufficient plasticity). Indeed, temporal fluctuations may promote the evolution  
of plasticity to such an extent that future range expansion may be facilitated  
652 in comparison to when the environmental conditions are static. This is only  
true, however, when the cost of plasticity is sufficiently low, as our results show.  
654 More generally, our results show how the key parameters, including the carrying  
capacity, the maximal intrinsic growth rate, and plasticity costs, jointly impact  
656 on the conditions a population may adapt to and tolerate. Notably, we show  
that enhancing the growth rate or the carrying capacity of a population may  
658 potentially facilitate the evolution of plasticity and thereby increase the range  
of conditions a population may endure. We, therefore, suggest that the param-  
660 eters identified in our analytical treatment, notably the carrying capacity, the  
maximal intrinsic growth rate, and plasticity costs should be taken into account,  
662 for example, when designing assisted evolution programmes aimed at increasing  
the tolerance of populations to future climate change [68, 69, 70, 71].

664 Furthermore, invasive species are a major threat to biodiversity worldwide  
[72]. Invasive species often exhibit higher plasticity than non-invasive species  
666 do [73, 74, 75] and it has been suggested that plasticity may be a key factor  
governing the invasion success of invasive species [73, 75, 76]. Here, we empha-  
668 sise that a key factor may, instead, be the cost of plasticity for the trait under  
selection relative to the critical cost of plasticity. Thus, management of ecosys-  
670 tems aimed at preventing the spread of invasive species should take plasticity  
and, specifically, the critical cost of plasticity into account [77, 78, 79]. This will  
672 be particularly important for mitigating potentially elevated risks of biological

invasions associated with climate change [77, 80].

## 674 **4.5 Conclusion**

We identified the key parameters that determine when the capacity for plasticity  
676 increases the range of a population. Specifically, we derived an approximation  
for the critical plasticity cost above which plasticity is detrimental to the pop-  
678 ulation throughout its entire range. Our results suggest an important role of  
plasticity costs for range expansions and persistence of ranges, not least in the  
680 face of increasingly temporally unstable environmental conditions.

## 5 Authors' contributions

682 Conceptualization: MR. Data curation: ME and MR. Formal analysis: ME  
and MR. Funding acquisition: MR. Investigation: ME and MR. Methodology:  
684 ME and MR. Project administration: ME and MR. Resources: MR. Software:  
ME. Supervision: MR. Validation: ME and MR. Visualization: ME and MR.  
686 Writing – original draft: ME and MR. Writing – review & editing: ME and  
MR.

## 688 6 Competing interests

We declare we have no competing interests.

## 690 7 Funding

This work was supported by the Hasselblad Foundation Grant to Female Sci-  
692 entists awarded to MR, by a grant from the Swedish Research Council Formas  
to MR, and it was additionally supported by grants from Swedish Research  
694 Councils (Formas and VR) to the CeMEB. The simulations were enabled by re-  
sources provided by the Swedish National Infrastructure for Computing (SNIC)  
696 at the National Supercomputing Centre (NSC) at the University of Linköping  
and at Chalmers Centre for Computational Science and Engineering (C3SE) at  
698 Chalmers University of Technology, partially funded by the Swedish Research  
Council through grant agreement no. 2018-05973.

## 700 8 Acknowledgements

We thank all the speakers and participants of the Webinar “Evolution of Species  
702 Ranges” held online March 8-10, 2021, for their valuable comments and discus-  
sions on the topic.



## 704 Appendix A Additional model details

706 In this appendix, we present additional details regarding the individual-based model outlined in the main text.

**Optimal phenotype.** The habitat was modelled as a one-dimensional chain of  $M = 220$  demes. The mean optimal phenotype in deme  $i$ , denoted by  $\bar{\theta}^{(i)}$ , was assumed to be a cubic polynomial of  $i$

$$\bar{\theta}^{(i)} = 0.0002(i - 1)^3 - 0.0633(i - 1)^2 + 6.9282(i - 1) - 252.88. \quad (\text{A1})$$

710 The coefficients in equation (A1) were chosen in such a way that the polynomial had an inflection point in the centre of the habitat, and  $\bar{\theta}^{(i)} + \bar{\theta}^{(221-i)} = 0$   
712 for  $i = 1, 2, \dots, 220$ . Furthermore, the gradients in the edges were chosen to be sufficiently steep to make sure that range margins would form well before  
714 the edges for a population without plasticity. We allowed the environmental conditions to fluctuate in time in such a way that the optimal phenotype in  
716 deme  $i$  in generation  $\tau$  was

$$\theta_{\tau}^{(i)} = \bar{\theta}^{(i)} + \epsilon_{\tau}^{(i)} \quad (\text{A2})$$

where  $\epsilon_{\tau}^{(i)}$  is a random number sampled from the normal distribution with mean  
718 0 and standard deviation  $\sigma_{\theta}$ , independently for different demes and at different generations. Table A1 lists the values of  $\sigma_{\theta}$  that we explored.

720 Note that the coefficients in equation (A1) are different from the coefficients in equation (A1) in [40]. In particular, the habitat in this study contains more  
722 demes, and the steepness of the gradient increases faster than in [40]. This was done for practical reasons, to allow for potentially high plasticity to evolve  
724 before the population reaches the habitat edges.

For comparison, we also performed a set of simulations of range expansion  
726 along an environment that changes linearly in space (without temporal fluctuations). The constant gradient was chosen according to the following two criteria.  
728 First, the gradient should be steep enough to allow high plasticity (equation (5) in the main text) to be obtained with plasticity cost parameters  $\gamma = \delta = 0.5$ .  
730 Second, the gradient should not be so steep that global extinction is expected to occur, that is, the gradient must be smaller than the critical genetic gradient  
732 (defined in the main text; see also [11]). To satisfy these criteria, the phenotypic optimum was chosen to be  $\bar{\theta}^{(i)} = 1.2(i - 110.5)$ . Note that this constant gra-  
734 dient is less steep than the gradient required to attain the phenotypic optima in the edges of the habitat realised in our model (equation A1) with a steepen-  
736 ing gradient (the phenotypic optima in the edges for the above chosen constant gradient are  $\pm 131.4$  in contrast to  $\pm 252.9$  for the steepening gradient).

738 In the simulations where the environmental gradient was constant, the allele effect sizes were chosen to ensure that the selection per allele in the edges of  
740 the habitat was the same as in the main model for both the non-plastic and the plastic component of the phenotype. To satisfy this requirement, we kept the  
742 allele effect sizes for the non-plastic component of the phenotype the same as in the main model (with a steepening gradient), while the allele effect sizes for

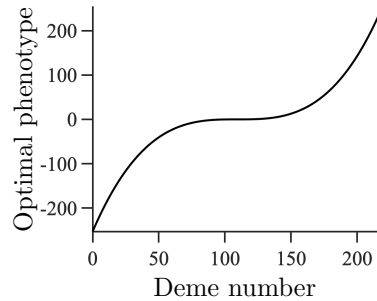

Figure A1: Optimal phenotype as a function of deme number. The line corresponds to a symmetric cubic polynomial with a horizontal inflection point in the centre of the habitat. For this polynomial, the optimal phenotype ranges between  $-252.9$  in the leftmost deme to  $+252.9$  in the rightmost deme.

744 the plastic component were chosen in such a way that the expressed plasticity  
746 per allele was the same in the habitat edges as for the main model (that is,  
748 the effect sizes of single alleles were increased by a factor  $252.9/131.4$  whereas  
750 the phenotypic optimum in the edges was decreased by the same factor, thus  
752 keeping the plastic response per allele constant). This, in turn, allowed us  
754 to employ a smaller number of loci in simulations where the environmental  
756 gradient was constant ( $L=415$ ) as compared to the simulations where it was  
steepening ( $L = 799$ ). Thus, if all loci underlying the non-plastic component  
were homozygous for alleles with effect size  $\alpha/2$  in deme  $M$  (or homozygous for  
alleles with effect size  $-\alpha/2$  in deme 1), the edge populations would be perfectly  
adapted to the local environmental conditions. Similarly, the maximal plastic  
response was chosen to be  $\pm 2$ , as in the main model. The remaining model  
parameters were the same as those employed in the main model.

**Initialisation of simulations.** At the start of each simulation, the popula-  
758 tion occupied  $M/5 = 44$  adjacent demes arranged side-by side around the centre  
of the habitat. The starting genotypes were generated in the following way. For  
760 the non-plastic component of the phenotype,  $z_{\tau,k}^{(i)}$ , we used the approach ex-  
plained in [40]:  $\lceil \frac{L}{5} \rceil$  loci (where  $\lceil y \rceil$  denotes the smallest integer larger than or  
762 equal to  $y$ ) were chosen at random and assigned allele frequencies according to  
the clines at migration-selection equilibrium [10]. Among the remaining loci,  
764 half were chosen uniformly at random to be homozygous for alleles with effect  
size  $-\frac{\bar{\theta}^{(M)}}{2L}$ , and the remaining loci were chosen to be homozygous for alleles  
766 with effect size  $\frac{\bar{\theta}^{(M)}}{2L}$  (if the number of remaining loci was odd, one more locus  
was chosen to be homozygous for the allele with effect size  $\frac{\bar{\theta}^{(M)}}{2L}$ ). The same  
768 loci were chosen to be homozygous for the same allele for all individuals and  
in all demes. Thus, the average phenotype of the population followed the local  
770 optimum initially.

Conversely, for plasticity, one half of the loci were chosen uniformly at ran-

772 dom to be homozygous for alleles of effect size  $\frac{1}{L}$ , and the remaining loci were  
 774 chosen to be homozygous for alleles of effect size  $-\frac{1}{L}$  (when the number of loci  
 776 was odd, one randomly chosen locus was chosen to be heterozygous). As for  
 778 the non-plastic component, the same loci were chosen to be homozygous for the  
 same allele for all individuals and in all demes. Thus, plasticity was initially  
 set to zero for all individuals within the starting population, and the genetic  
 variation for the plastic component of the phenotype was minimised throughout  
 the initially occupied habitat.

780 **Cost-related function.** We assumed in the model that plasticity may be  
 more or less costly, with the cost determined by a function  $C_\gamma(g_{\tau,k}^{(i)}, \delta)$  of the  
 782 form

$$C_\gamma(g_{\tau,k}^{(i)}, \delta) = (1 - \delta |g_{\tau,k}^{(i)}|)^\gamma. \quad (\text{A3})$$

Here,  $g_{\tau,k}^{(i)}$  denotes plasticity for individual  $k$  in deme  $i$ , in generation  $\tau$ , and the  
 784 parameters  $\delta$  and  $\gamma$  are non-negative parameters, assumed to be constant over  
 time and the same for all individuals (see Methods in the main text for more  
 786 details). The effect of  $C_\gamma(g_{\tau,k}^{(i)}, \delta)$  on the fitness of individuals with costly plas-  
 ticity, in comparison to the fitness of individuals without any cost of plas-  
 788 ticity (i.e., when  $C_\gamma(g_{\tau,k}^{(i)}, \delta) \equiv 1$ ) is illustrated graphically in Fig A2.

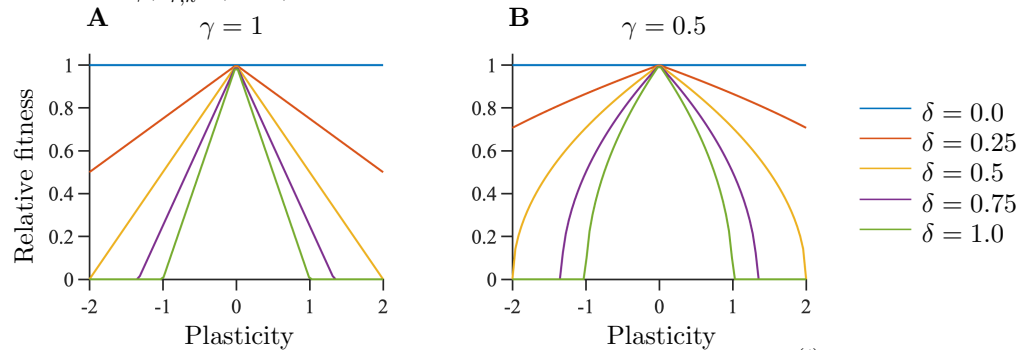

Figure A2: Reduction in fitness due to the cost-related function,  $C_\gamma(g_{\tau,k}^{(i)}, \delta)$ . A value of 1 in this figure indicates that there is no cost of plasticity and a value of 0 indicates that the cost is so high that the individual does not reproduce at all (it has a fitness of zero). The lines intersect the  $x$ -axis when  $|g_{\tau,k}^{(i)}| = 1/\delta$ .

790 **Allele effect sizes at loci underlying plasticity.** Note that  $\alpha$  is approx-  
 imately 126 times larger than  $\beta$  (table A1; but we also ran simulations with  
 larger  $\beta$ , figure C15). The relative difference between the effects that the two  
 792 kinds of alleles have on the phenotype differs depending on  $\theta_\tau^{(i)}$  (i.e., the distance  
 from the reference environment). In the habitat edges, the average contribution  
 794 to the phenotype from an allele with effect size  $+\beta/2$  underlying plasticity is  
 $\bar{\theta}^{(M)}\beta/2$ , which is twice as large as  $\alpha/2$ . By contrast, the contribution to the  
 796 phenotype from an allele with effect size  $+\beta/2$  coding for plasticity approaches

798 zero in the centre of the habitat. The contribution from any allele coding for the  
non-plastic component is equal to the effect size of that allele, independently of  
deme position.

800 **Parameter choices.** As explained in the main text, analytical calculations  
based on a simplified model suggest three qualitatively different regimes of the  
802 realised population dynamics with respect to the expected range and the plas-  
ticity throughout the range. Which of these three regimes is realised depends  
804 on the following parameters: the cost of plasticity, governed by a scale param-  
eter ( $\delta$ ) and a shape parameter ( $\gamma$ ) relative to the maximal intrinsic growth  
806 rate,  $\gamma/r_m$ ; the parameter  $K\sigma\sqrt{s}$  (i.e., the strength of selection per locus on  
the non-plastic component of the phenotype multiplied by the maximum lo-  
808 cal population density); the parameter  $\sigma_\theta^2/(\sigma_\theta^2 + V_S)$  (i.e., the variance of the  
temporal fluctuations in the optimal phenotype relative to  $\sigma_\theta^2 + V_S$ ); and the  
810 shape of the function that determines the optimal phenotype,  $\bar{\theta}^{(i)}$  (see table 1  
in the main text for a list of parameters). The three different regimes are: 1)  
812 no difference in the expected range compared to when the trait under selection  
is purely non-plastic (denoted by  $R_0$  throughout), 2) a larger, but finite, range  
814 for populations with capacity for plasticity, compared to when the trait under  
selection is purely non-plastic (denoted by  $R_1$  throughout), and 3) a regime  
816 where infinite range expansion may occur (denoted by  $R_2$  throughout). An il-  
lustration of where in the parameter space these three regimes are realised is  
818 shown in figure 1. Further details are given in Appendix B.

To test the main predictions from the above-mentioned analytical calcula-  
820 tions, and to confirm the existence of these three regimes, we used computer  
simulations for different values of the first three among the four parameters  
822 mentioned above (i.e., we varied  $\delta$ ,  $\gamma/r_m$  (keeping  $r_m$  constant),  $\sigma_\theta^2/(\sigma_\theta^2 + V_S)$   
(keeping  $V_S$  constant), and  $K\sigma\sqrt{s}$  (keeping  $\sigma$  and  $s$  constant), but we did not  
824 vary  $\bar{\theta}^{(i)}$ ). The parameters were chosen to be within each of the three possible  
regimes, and we included a few borderline cases to test for robustness of the  
826 analytical results.

First, for the regime  $R_0$  and no temporal fluctuations in the optimal pheno-  
828 type, we used cost parameters  $\delta = 0.75$  or  $\delta = 0.6$  for  $\gamma/r_m = 1$  ( $\delta = 0.6$  being  
very close to regime  $R_1$  and/or  $R_2$ ) and  $\delta = 1.3$  for  $\gamma/r_m = 0.5$ , with  $K\sigma\sqrt{s}$   
830 set to  $K\sigma\sqrt{s} = 16$  in each case. To further validate our results, we assessed  
the model outcomes with a parameter combination where the cost of plas-  
832 ticity was sufficiently low to allow the population to have a positive growth rate  
if the phenotype would be determined entirely by plasticity although equation  
834 (6) predicts the range margin to be established at the critical genetic gradient.  
This parameter combination was  $K\sigma\sqrt{s} = 8$ ,  $\delta = 0.5$  and  $\gamma/r_m = 0.5$ . Notably,  
836 in this case our simulation results indeed show that the realised dynamics fall  
within regime  $R_0$ , in line with our analytical results. This is because, as we show  
838 in Appendix B, the critical gradient *sensu* [11] is shallower than the smallest  
gradient where non-zero plasticity improves the population's mean fitness and  
840 hence plasticity either does not evolve at all, or it is not maintained in the long

Table A1: Parameter values examined.

| Parameter                   | Value(s)                                                   |
|-----------------------------|------------------------------------------------------------|
| $M$                         | 220                                                        |
| $K$                         | 50, 100                                                    |
| $\sigma$                    | 1                                                          |
| $\sigma_\theta$             | 0, $\sqrt{2\alpha}$ , $\sqrt{5\alpha}$ , $\sqrt{10\alpha}$ |
| $\gamma$                    | 0.25, 0.5, 1                                               |
|                             | 0.25, 0.6, 0.75 (for $\gamma = 1$ )                        |
| $\delta$                    | 0.5, 0.9, 1.3 (for $\gamma = 0.5$ )                        |
|                             | 1.1 (for $\gamma = 0.25$ )                                 |
| $r_m$                       | 1                                                          |
| $V_S$                       | 2                                                          |
| $\mu$                       | $10^{-6}$                                                  |
| $L$                         | 799                                                        |
| $\alpha$                    | $\frac{1}{\sqrt{10}}$                                      |
| $\beta = 1/L$               | $1.25 \cdot 10^{-3}$                                       |
| $s = \frac{\alpha^2}{2V_S}$ | $\frac{1}{40}$                                             |
| $K\sigma\sqrt{s}$           | 8, 16                                                      |

Note: Among the parameter combinations listed, we performed simulations with a subset of combinations, allowing us to capture qualitatively similar as well as different simulation outcomes.

run. For regime  $R_0$  with temporal fluctuations in the optimal phenotype, we  
 842 used  $\sigma_\theta^2 = 2\alpha$  and the cost parameters  $\delta = 0.75$  for  $\gamma/r_m = 1$  and  $\delta = 1.3$  for  
 $\gamma/r_m = 0.5$ . In both cases we used  $K\sigma\sqrt{s} = 16$ .

844 Second, for the regime  $R_1$  and no temporal fluctuations in the optimal phe-  
 notype, we used  $\delta = 0.9$ ,  $\gamma/r_m = 0.5$  and  $\delta = 1.1$ ,  $\gamma/r_m = 0.25$ . In both cases,  
 846 we used  $K\sigma\sqrt{s} = 16$ . For regime  $R_1$  with temporal fluctuations in the optimal  
 phenotype, we used the following parameter combinations:  $\sigma_\theta^2 = 2\alpha$  with the  
 848 cost parameters  $\delta = 0.9$  and  $\gamma/r_m = 0.5$ ;  $\sigma_\theta^2 = 5\alpha$  or  $\sigma_\theta^2 = 10\alpha$ , with the cost  
 parameters  $\delta = 0.75$  and  $\gamma/r_m = 1$ ,  $\delta = 0.9$  and  $\gamma/r_m = 0.5$ , or  $\delta = 1.3$  and  
 850  $\gamma/r_m = 0.5$ . In all cases we used  $K\sigma\sqrt{s} = 16$ .

Third, for the regime  $R_2$  and no temporal fluctuations in the optimal pheno-  
 852 type, we used  $\delta = 0.25$  for  $\gamma/r_m = 1$  and  $\delta = 0.5$  for  $\gamma/r_m = 0.5$ . In both cases,  
 we used  $K\sigma\sqrt{s} = 16$ . For regime  $R_2$  with temporal fluctuations in the optimal  
 854 phenotype, we used the following parameter combinations:  $\sigma_\theta^2 = 2\alpha$  with the  
 cost parameters  $\delta = 0.25$  and  $\gamma/r_m = 1$ , or  $\delta = 0.5$  and  $\gamma/r_m = 0.5$ ;  $\sigma_\theta^2 = 5\alpha$   
 856 or  $\sigma_\theta^2 = 10\alpha$ , with the cost parameters  $\delta = 0.25$  and  $\gamma/r_m = 1$ , or  $\delta = 0.5$  and  
 $\gamma/r_m = 0.5$ . In all cases we used  $K\sigma\sqrt{s} = 16$ .

858 For each regime, we ran 200,000 generations for the parameters with  $\gamma = 0.5$   
 when  $\sigma_\theta^2 = 0$  or  $\sigma_\theta^2 = 2\alpha$ , or when  $\gamma = 0.25$ , and 100,000 generations for the  
 860 remaining parameter combinations. The results are shown and discussed in the  
 main text (see also Appendix B).

## 862 Appendix B Analytical approximations for the 863 optimal plasticity

864 In this appendix, we derive an analytical approximation for the plasticity that  
865 locally maximises the average population growth rate in equilibrium (hereafter  
866 called the *optimal plasticity*). This approximation gives an estimate for when  
867 the capacity for plasticity cannot increase the equilibrium range of the popula-  
868 tion, compared to the expected range of a population that does not have the  
869 capacity for plasticity. Although the approximation relies on many simplifying  
870 assumptions, it gives a qualitatively good agreement with our simulation results.

In what follows, we describe the model we use to carry out the analytical  
872 calculations in this appendix. This model is a simplified version of the model  
873 described in the main text. The model simplifications here were made to ease the  
874 analytical treatment of the system. In this appendix, we assume that the local  
875 population density is so large that drift can be neglected (but this assumption  
876 is relaxed in subsection B4), and perform the derivations in a continuous one-  
877 dimensional space,  $x$ , and continuous time,  $t$ . The discrete case can be obtained  
878 by defining  $\Delta x$  as the distance between two neighbouring demes and  $\Delta t$  as the  
879 time between two successive generations. Individuals are assumed to be diploid.  
880 We use  $\theta(x, t)$  to denote the optimal phenotype in position  $x$  in time  $t$ . As in  
881 [10], we assume that the optimal phenotype can be approximated locally by a  
882 function that changes linearly in space. We denote by  $z(x, t)$  the non-plastic  
883 component of the phenotype of an individual, considered as an observation of  
884 a random variable sampled over the population in position  $x$  and time  $t$ . We  
885 assume that plasticity is constant in time and, locally, in space, and we denote  
886 it by  $g$ . Recall that the phenotype, denoted by  $u(x, t)$ , is the sum of a non-  
887 plastic component,  $z(x, t)$ , and a plastic component,  $g\theta(x, t)$  (the latter being  
888 the product of plasticity  $g$  and the optimal phenotype  $\theta(x, t)$  of the trait under  
889 selection), that is:

$$890 \quad u(x, t) = z(x, t) + g\theta(x, t). \quad (\text{B1})$$

We assume that the non-plastic component is underlain by  $L$  freely recombining  
892 loci, and that there are two possible effect sizes for alleles coding for the non-  
893 plastic component, i.e.,  $\pm\alpha/2$ . We use  $\bar{u}(x, t)$  and  $\bar{z}(x, t)$  to denote the expected  
894 value of the population mean in position  $x$  and time  $t$  for the phenotype and the  
895 non-plastic component of the phenotype, respectively (hereafter called the *mean*  
896 *phenotype* and the *mean non-plastic component of the phenotype*, respectively).  
897 For a given  $g$  and a given population variance  $V_z$  of the non-plastic component  
898 of the phenotype, the rate of change of the mean phenotype and of the local  
899 population density are given by [81]

$$900 \quad \frac{\partial \bar{u}(x, t)}{\partial t} = \frac{\sigma^2}{2} \frac{\partial^2 \bar{u}(x, t)}{\partial x^2} + \sigma^2 \frac{\partial \ln[N(x, t)]}{\partial x} \frac{\partial \bar{u}(x, t)}{\partial x} + V_z \frac{\partial \bar{r}(\bar{u}, N)}{\partial \bar{u}(x, t)}, \quad (\text{B2})$$

$$902 \quad \frac{\partial N(x, t)}{\partial t} = \frac{\sigma^2}{2} \frac{\partial^2 N(x, t)}{\partial x^2} + N(x, t) \bar{r}(\bar{u}, N). \quad (\text{B3})$$

Furthermore, in linkage equilibrium, the rate of change of the allele frequencies  $p_{z,j}$  at locus  $j$  are given by [10]

$$\frac{\partial p_{z,j}(x,t)}{\partial t} = \frac{\sigma^2}{2} \frac{\partial^2 p_{z,j}(x,t)}{\partial x^2} + \sigma^2 \frac{\partial \ln[N(x,t)]}{\partial x} \frac{\partial p_{z,j}(x,t)}{\partial x} + p_{z,j} q_{z,j} \frac{\partial \bar{r}(\bar{u}, N)}{\partial p_{z,j}(x,t)} - \mu(p_{z,j} - q_{z,j}). \quad (\text{B4})$$

Here,  $\mu$  denotes the mutation rate and  $q_{z,j} = 1 - p_{z,j}$ . We define the continuous growth rate for an individual with phenotype  $u(x,t)$  and plasticity  $g$  in a location where the optimal phenotype is  $\theta(x,t)$  and the population density is  $N(x,t)$  as

$$r(u(x,t), g, N(x,t), \theta(x,t)) = r_m \left(1 - \frac{N(x,t)}{K}\right) - \frac{(u(x,t) - \theta(x,t))^2}{2V_S} + \ln(C_\gamma(g, \delta)), \quad (\text{B5})$$

where  $r_m$  denotes the maximal intrinsic growth rate,  $K$  denotes the local carrying capacity, and  $V_S$  denotes the width of stabilising selection. Note that  $r(u(x,t), g, N(x,t), \theta(x,t))$  depends on  $z(x,t)$  through  $u(x,t)$ ,  $g$  and  $\theta(x,t)$ . The function

$$C_\gamma(g, \delta) = (1 - \delta|g|)^\gamma \quad (\text{B6})$$

denotes a cost-related function for plasticity, where the non-negative parameters  $\gamma$  and  $\delta$  determine the degree of convexity/concavity of the cost-related function, and the threshold plasticity above which the maximal fitness of an individual is zero ( $|g| < 1/\delta$ ), respectively (see Methods for a more detailed description). Note that the growth rate, given by equation (B5), corresponds to the logarithm of the discrete fitness function divided by two, i.e.  $\ln(W_{\tau,k}^{(i)}/2)$  (see equation (2) in the main text).

As mentioned above, we use this simplified model to find the optimal plasticity of the population. The derivation is explained next.

## B.1 Optimal plasticity under static environmental conditions

To find the optimal plasticity, we first reduce the number of parameters in equation (B5) by re-scaling them. Note that, for locally constant plasticity, the deviation of phenotype  $u(x,t)$  from the local optimum can be expressed in terms of the non-plastic component of the phenotype ( $z(x,t)$ ) and a re-scaled optimum ( $(1-g)\theta(x,t)$ ) [23]

$$u(x,t) - \theta(x,t) = z(x,t) + g\theta(x,t) - \theta(x,t) = z(x,t) - (1-g)\theta(x,t). \quad (\text{B7})$$

Moreover, for any general cost-related function (including the one considered in our model), which we denote here by  $c_g$  (for simplicity and to emphasise the generality) the following holds

$$r_m \left(1 - \frac{N(x,t)}{K}\right) - c_g = [r_m - c_g] \left(1 - \frac{N(x,t)}{K(1 - c_g/r_m)}\right). \quad (\text{B8})$$



942 Thus, upon re-scaling the parameters  $\theta(x, t)$ ,  $r_m$  and  $K$  as follows

$$\theta_g(x, t) = (1 - g)\theta(x, t), \quad (\text{B9})$$

944  $r_g = r_m - c_g, \quad (\text{B10})$

946  $K_g = K \left(1 - \frac{c_g}{r_m}\right), \quad (\text{B11})$

we re-write equation (B5) as

948  $r(z(x, t), N(x, t), \theta_g(x, t)) = r_g \left(1 - \frac{N(x, t)}{K_g}\right) - \frac{(z(x, t) - \theta_g(x, t))^2}{2V_S}. \quad (\text{B12})$

950 For the remainder of this subsection, we assume that local optimum for the phe-  
 951 notype,  $\theta(x, t)$ , is kept constant in time. To emphasise the absence of temporal  
 952 fluctuations in the environmental conditions in the following calculations, we use  
 953  $\theta(x)$  in place of  $\theta(x, t)$  and  $\theta_g(x)$  in place of  $\theta_g(x, t)$ . Furthermore, recall that  
 954 we assume that both the plastic component of the phenotype and the locally  
 955 optimal phenotype are determined exactly by the same environmental variable.  
 956 Under these assumptions we have, thus, reduced the model with constant plas-  
 957 ticity to the di-allelic model that has been analysed in [10]. By analogy to [10], it  
 958 follows that the only stable equilibrium for equations (B2)-(B3) as  $t \rightarrow \infty$  (un-  
 959 der the assumption that plasticity  $g$  is constant) corresponds to a state where  
 960 the population size locally constant and the average phenotype in position  $x$   
 961 equals  $\theta_g(x)$ . In addition, the contributions to linkage disequilibrium (LD) from  
 962 dispersal and stabilising selection in equilibrium cancel out in our model (when  
 963 selection is weak relative to recombination so that the quasi-linkage equilibrium  
 964 can be assumed [82]) by the same arguments as in [11].

964 As stated in the beginning of this appendix, we define the optimal plasticity  
 965 as the plasticity that maximises the mean growth rate of the population (equa-  
 966 tion (B12)) in equilibrium. The next step is, thus, to find the population mean  
 967 of equation (B12) in equilibrium.

968 We denote the equilibrium population size, and non-plastic component of  
 969 the phenotype at position  $x$  by  $N_e(x)$ , and  $z_e(x)$ . By taking the population  
 970 mean of equation (B12) in equilibrium, we find

$$\bar{r}(z_e(x), g, N_e(x), \theta(x)) = r_g \left(1 - \frac{N_e(x)}{K_g}\right) - \frac{(\bar{z}_e(x) - \theta_g(x))^2}{2V_S} - \frac{\text{Var}[z_e(x)|g]}{2V_S}. \quad (\text{B13})$$

972 Here,  $\text{Var}[z_e(x)|g]$  denotes the local migration-selection equilibrium population  
 973 variance of the non-plastic component of the phenotype  $z_e(x)$  in deme  $x$ , for  
 974 given plasticity  $g$ . Recalling that  $\bar{z}_e(x) = \theta_g(x) = (1 - g)\theta(x)$  and using the  
 975 above mentioned analogy to [10], it follows that

976  $\text{Var}[z_e(x)|g] = |1 - g|b(x)\sigma\sqrt{V_S}. \quad (\text{B14})$

Here,  $b(x) = \partial\theta(x)/\partial x$  denotes the environmental gradient in position  $x$ .

978 Upon expressing equation (B13) in terms of  $K$ ,  $r_m$ ,  $\bar{u}_e(x) = \bar{z}_e(x) + g\theta(x)$ ,  
 and  $c_g = C_\gamma(g, \delta) = \gamma \ln(1 - \delta|g|)$ , and using equation (B14), we find

980

$$\bar{r}(\bar{u}_e(x), g, N_e(x), \theta(x)) =$$

982

$$r_m \left(1 - \frac{N_e(x)}{K}\right) - \frac{(\bar{u}_e(x) - \theta(x))^2}{2V_S} - \frac{|1 - g|b(x)\sigma}{2\sqrt{V_S}} + \gamma \ln(1 - \delta|g|). \quad (\text{B15})$$

984 To find the optimal plasticity, denoted by  $g_e^*(x)$ , we maximise equation (B15)  
 with respect to  $g$ , under the requirement that  $\bar{r}(\bar{u}_e, g_e^*, N_e, \theta, x) \geq 0$ , and that  
 986  $|g_e^*(x)| < 1/\delta$  (note that this inequality is strict because the growth rate has  
 singularities at the points where  $|g| = 1/\delta$ ).

988 To this end, note that equation (B15) is differentiable when  $g < 0$ ,  $g > 1$ , or  
 $0 < g < 1$ . In these cases, the derivative of equation (B15) with respect to  $g$  is  
 990 given by

992

$$\frac{\partial}{\partial g} \bar{r}(\bar{u}_e(x), g, N_e(x), \theta(x)) =$$

994

$$= -\frac{2\theta(x)(\bar{u}_e(x) - \theta(x))}{2V_S} + \text{sign}(1 - g) \frac{b(x)\sigma}{2\sqrt{V_S}} - \text{sign}(g) \frac{\gamma\delta}{1 - \delta|g|}. \quad (\text{B16})$$

Here,  $\text{sign}(y)$  is the signum function, which is 1 when  $y$  is positive,  $-1$  when  
 996  $y$  is negative, and it is not defined when  $y = 0$ . Note that, because  $|g| <$   
 $1/\delta$  by equation (B6), it follows that equation (B16) is strictly positive for all  
 998  $g < 0$  and strictly negative for all  $g > 1$ . Consequently, equation (B15) has  
 a maximum at  $g_e^*$  such that  $0 \leq g_e^* \leq 1$  when  $\delta \leq 1$ , or a maximum such  
 1000 that  $0 \leq g_e^* < 1/\delta$  when  $\delta \geq 1$  (recall that  $|g|$  is bounded above by the positive  
 number  $1/\delta$  according to equation (B6)). The right hand side (RHS) of equation  
 1002 (B16) implies that there is a trade-off between two components of the growth  
 rate when plasticity is increased (assuming  $0 \leq g \leq 1$ ). Increased plasticity  
 1004 decreases the genetic load caused by migration between neighbouring demes  
 (i.e., migration load), which is described by  $b(x)\sigma/(2\sqrt{V_S})$  [10], but it increases  
 1006 the cost of plasticity, described by  $\gamma\delta/(1 - \delta g)$ . When the benefit of decreasing  
 the migration load is greater than the disadvantage of increasing the cost of  
 1008 plasticity, equation (B16) implies that increased plasticity increases the mean  
 growth rate of the population. Conversely, when the disadvantage of increasing  
 1010 the cost of plasticity is greater than the advantage of decreasing the migration  
 load, equation (B16) implies that decreased plasticity increases the mean growth  
 1012 rate of the population.

To find the maximum of equation (B15), note that if equation (B16) is  
 1014 strictly negative on the open interval  $0 < g < m$  where  $m = \min(1, 1/\delta)$  (the  
 interval is not including the discontinuities that equation (B16) has at 0 and 1  
 1016 or the singularity it has at  $1/\delta$ ), it follows that equation (B15) has a maximum  
 at  $g_e^* = 0$ . If equation (B16) is strictly positive on the open interval  $0 < g < 1$ ,  
 1018 it follows that equation (B15) has a maximum at  $g_e^* = 1$ .

To find when equation (B16) is strictly positive or strictly negative on the  
 1020 interval  $0 < g < 1$ , note that  $\text{sign}(1 - g) = \text{sign}(g) = 1$  and  $|g| = g$  when

1022  $0 < g < 1$ . Furthermore, the first term in equation (B16) is zero on average in equilibrium because  $\bar{u}_e(x) = \theta(x)$ . Thus, equation (B16) reduces to

$$\frac{\partial}{\partial g} \bar{r}(\bar{u}_e(x), g, N_e(x), \theta(x)) = \frac{b(x)\sigma}{2\sqrt{V_S}} - \frac{\gamma\delta}{1 - \delta g}. \quad (\text{B17})$$

1024 Under the assumption that  $g < 1/\delta$ , equation (B17) is a monotonically decreasing function of  $g$ . Hence, if it is positive for  $g = 1$ , then it is strictly positive on  
1026 the interval  $0 < g < 1$ . That is, if

$$\frac{b(x)\sigma}{2\sqrt{V_S}} - \frac{\gamma\delta}{1 - \delta} \geq 0, \quad (\text{B18})$$

1028 then equation (B17) is strictly positive on the interval  $0 < g < 1$ . Similarly, if

$$\frac{b(x)\sigma}{2\sqrt{V_S}} - \gamma\delta \leq 0, \quad (\text{B19})$$

1030 then equation (B17) is strictly negative on the interval  $0 < g < 1$ . In other words, when  $0 \geq 1/\delta - 2\gamma\sqrt{V_S}/(\sigma b(x))$ , it follows that  $g_e^* = 0$ . Similarly, when  
1032  $1 \leq 1/\delta - 2\gamma\sqrt{V_S}/(\sigma b(x))$ , it follows that  $g_e^* = 1$ .

1034 Otherwise, when  $0 < 1/\delta - 2\gamma\sqrt{V_S}/(\sigma b(x)) < 1$ , a maximum to equation (B15) satisfies

$$\frac{\partial}{\partial g} \bar{r}(\bar{u}_e(x), g, N_e(x), \theta(x))|_{g=g_e^*} = 0, \quad (\text{B20})$$

1036 and

$$\frac{\partial^2}{\partial g^2} \bar{r}(\bar{u}_e(x), g, N_e(x), \theta(x))|_{g=g_e^*} < 0. \quad (\text{B21})$$

1038 From equation (B20), we find

$$\frac{b(x)\sigma}{2\sqrt{V_S}} - \frac{\gamma\delta}{1 - \delta g_e^*} = 0. \quad (\text{B22})$$

1040 The solution to (B22) with respect to  $g_e^*$  is given by

$$g_e^*(x) = \frac{1}{\delta} - \frac{2\gamma\sqrt{V_S}}{\sigma b(x)}. \quad (\text{B23})$$

1042 To see that (B23) maximises equation (B15) with respect to  $g$  in the case when  $0 < g_e^* < 1$ , note that the following holds for the second derivative of  
1044 equation (B15) with respect to  $g$ , evaluated at  $g_e^*$

$$\frac{\partial^2}{\partial g^2} \bar{r}(g, N_e(x), \theta(x))|_{g=g_e^*} = -\frac{\theta^2(x)}{V_S} - \gamma \left( \frac{\delta}{1 - \delta|g_e^*|} \right)^2 \leq 0. \quad (\text{B24})$$

1046 Here, the equality holds if and only if both  $\theta(x) = 0$  and  $\gamma\delta = 0$ . Otherwise, the second derivative is negative. Thus, when at least one of the  $\theta(x)$  or  $\delta\gamma$   
1048 is non-zero, the second derivative is strictly negative for  $0 < g_e^* < 1$ . In other

words, if  $0 < 1/\delta - 2\gamma\sqrt{V_S}/(\sigma b(x)) < 1$ , then  $\bar{r}(\bar{u}_e, g, N_e, \theta)$  evaluated at  $g = g_e^*$ , with  $g_e^*$  given by equation (B23) corresponds to the global maximum of equation (B15) on the interval  $0 < g < 1$ . In the special case when  $\theta(x) = \delta\gamma = 0$  (i.e., when there is no cost of plasticity and plasticity does not alter the phenotype), the optimal plasticity cannot be defined.

In sum, under the assumptions that at least one of  $\theta(x)$  or  $\delta\gamma$  is non-zero, the optimal plasticity,  $g_e^*(x)$ , is given by

$$g_e^*(x) = \begin{cases} \frac{1}{\delta} - \frac{2\gamma\sqrt{V_S}}{\sigma b(x)}, & \text{for } 0 < \frac{1}{\delta} - \frac{2\gamma\sqrt{V_S}}{\sigma b(x)} < 1, \\ 1, & \text{for } \frac{1}{\delta} - \frac{2\gamma\sqrt{V_S}}{\sigma b(x)} \geq 1, \\ 0, & \text{for } \frac{1}{\delta} - \frac{2\gamma\sqrt{V_S}}{\sigma b(x)} \leq 0. \end{cases} \quad (\text{B25})$$

Recall that plasticity effectively reduces the steepness of the environmental gradient, and hence the difference between the phenotypic optima in neighbouring demes (equations (B7), (B9), and (B12); and see also [23]). Consequently, genetic differentiation between local populations is expected to be reduced in comparison to when the trait under selection is not plastic. Equation (B25) implies that when the cost for migration between neighbouring demes  $\sigma b(x)/(2\sqrt{V_S})$  is larger than the cost of plasticity  $\gamma\delta$  (equation (B19)), the population benefits from positive plasticity because the benefit of reducing migration load by  $\sigma b(x)/(2\sqrt{V_S})$  is greater than the cost of reducing the growth rate by  $\gamma\delta$ .

## B.2 Optimal plasticity in a spatially homogeneous environment with temporally fluctuating optimal phenotype

As in the previous subsection, we here aim to find the plasticity that maximises the average fitness of the population (i.e., the *optimal plasticity*). However, in this subsection we allow the optimal phenotype to fluctuate in time, but we assume that the time-average optimal phenotype is constant across space. This allows us to obtain an approximation for plasticity that is expected to evolve during our burn-in simulations (see Methods for details). Note that although the temporal fluctuations in the optimal phenotype were uncorrelated between neighbouring demes in our model, the average effect of the fluctuations over time is the same in each deme. To emphasise the absence of spatial heterogeneity in this subsection, we use  $u(t)$ ,  $N(t)$ , and  $\theta(t)$  in place of  $u(x, t)$ ,  $N(x, t)$ , and  $\theta(x, t)$ , respectively. We will also in this subsection assume that the genetic variance is approximately constant, and denote it by  $V_G$ . The fitness is, in this case, given by:

$$W(u(t), N(t), \theta(t)) = 2 \exp \left( r_m \left( 1 - \frac{N(t)}{K} \right) - \frac{(u(t) - \theta(t))^2}{2V_S} - \ln(1 - \delta|g|) \right). \quad (\text{B26})$$

By performing the re-scaling given in equations (B9)-(B11), but with  $\theta_g(t)$  in  
 1088 place of  $\theta_g(x, t)$ , the fitness can be written as

$$1090 \quad W(z(t), N(t), \theta_g(t)) =$$

$$1092 \quad 2 \exp \left( r_g \left( 1 - \frac{N(t)}{K_g} \right) - \frac{(z(t) - \theta_g(t))^2}{2V_S} \right). \quad (\text{B27})$$

Furthermore, as also pointed out in [83], the variance  $\sigma_\theta^2$  of the re-scaled local  
 1094 optimum  $\theta_g(t) = (1 - g)\theta(t)$  is given by

$$\sigma_{\theta_g}^2 = \text{Var}[(1 - g)\theta(t)] = (1 - g)^2 \sigma_\theta^2. \quad (\text{B28})$$

Assuming that the mean population phenotype has a fixed value  $\bar{z}$  in equilib-  
 1096 rium, we find, in accordance with previously published literature (e.g., [43, 44]),  
 1098 that the time-average of the mean population fitness  $\bar{W}(\bar{z}_e, N_e, \bar{\theta}_g)$  is given by:

$$1100 \quad \bar{W}(\bar{z}_e, N_e, \bar{\theta}_g) =$$

$$1102 \quad 2 \sqrt{\frac{V_S}{V_S + V_G + \sigma_{\theta_g}^2}} \exp \left( r_g \left( 1 - \frac{N_e}{K_g} \right) - \frac{(\bar{z}_e - \bar{\theta}_g)^2}{2(V_S + \sigma_{\theta_g}^2 + V_G)} \right). \quad (\text{B29})$$

Here  $\bar{\theta}_g$  denotes the mean of  $\theta_g(t)$ . Equation (B29) can be rewritten as:

$$1104 \quad \bar{W}(\bar{z}_e, N_e, \bar{\theta}_g) =$$

$$1106 \quad 2 \exp \left( r_g \left( 1 - \frac{N_e}{K_g} \right) - \frac{1}{2} \ln \left( 1 + \frac{V_G}{V_S} + \frac{\sigma_{\theta_g}^2}{V_S} \right) - \frac{(\bar{z}_e - \bar{\theta}_g)^2}{2(V_S + \sigma_{\theta_g}^2 + V_G)} \right). \quad (\text{B30})$$

From equation (B30) it follows that the average growth rate of the population  
 1108 is

$$1110 \quad \bar{r}(\bar{z}_e, N_e, \bar{\theta}_g) =$$

$$1112 \quad r_g \left( 1 - \frac{N_e}{K_g} \right) - \frac{1}{2} \ln \left( 1 + \frac{V_G}{V_S} + \frac{\sigma_{\theta_g}^2}{V_S} \right) - \frac{(\bar{z}_e - \bar{\theta}_g)^2}{2(V_S + \sigma_{\theta_g}^2 + V_G)}. \quad (\text{B31})$$

Writing equation (B31) in terms of  $u$ ,  $\sigma_\theta^2$ ,  $V_S$ ,  $K$ ,  $r_m$ , and  $c_g = \gamma \ln(1 - \delta|g|)$   
 1114 yields

$$1116 \quad \bar{r}(\bar{u}_e, N_e, \bar{\theta}) =$$

$$1118 \quad r_m \left( 1 - \frac{N_e}{K} \right) - \frac{1}{2} \ln \left( 1 + \frac{V_G}{V_S} + \frac{\sigma_\theta^2(1 - g)^2}{V_S} \right) -$$

$$1120 \quad \gamma \ln(1 - \delta|g|) - \frac{(\bar{u}_e - \bar{\theta})^2}{2(V_S + \sigma_\theta^2(1 - g)^2 + V_G)}. \quad (\text{B32})$$

To find the plasticity that maximises equation (B32), we first differentiate equation (B32) with respect to  $g$ , which in the absence of costs of plasticity:

$$\frac{\partial}{\partial g} \bar{r}(\bar{u}_e, N_e, \bar{\theta}) = \frac{\sigma_\theta^2(1-g)}{V_S + V_G + \sigma_\theta^2(1-g)^2} - \text{sign}(g) \frac{\gamma\delta}{1-\delta|g|} - \frac{(\bar{u}_e - \bar{\theta})(\bar{\theta}(V_S + \sigma_\theta^2(1-g)^2 + V_G) + (\bar{u}_e(x) - \bar{\theta})\sigma_\theta^2(1-g))}{(V_S + \sigma_\theta^2(1-g)^2 + V_G)^2}. \quad (\text{B33})$$

Upon assuming that  $\bar{u}_e = \bar{\theta}$  the last term vanishes and equation (B33) reduces to

$$\frac{\partial}{\partial g} \bar{r}(\bar{u}_e, N_e, \bar{\theta}) = \frac{\sigma_\theta^2(1-g)}{V_S + V_G + \sigma_\theta^2(1-g)^2} - \text{sign}(g) \frac{\gamma\delta}{1-\delta|g|} \quad (\text{B34})$$

Under the additional assumption that  $V_G \ll V_S$ , equation (B34) can be approximated as

$$\frac{\partial}{\partial g} \bar{r}(\bar{u}_e, N_e, \bar{\theta}) \approx \frac{\sigma_\theta^2(1-g)}{V_S + \sigma_\theta^2(1-g)^2} - \text{sign}(g) \frac{\gamma\delta}{1-\delta|g|} \quad (\text{B35})$$

Recall that  $|g| < 1/\delta$  (equation (B6)). Therefore, equation (B35) is strictly positive when  $g < 0$ . Furthermore, note that, under the assumption that  $\delta < 1$ , equation (B35) is strictly negative when  $g \geq 1$  (but approaches zero asymptotically at  $g = 1$  as  $\gamma \rightarrow 0$  or  $\delta \rightarrow 0$ ). Similarly, when  $\delta > 1$ , it follows that equation (B35) approaches  $-\infty$  as  $g \rightarrow 1/\delta$ . As a consequence, if equation (B32) has a maximum, this maximum lies on the interval  $[0, \min(1, 1/\delta))$  (note that the interval may include 0 but not 1 or  $1/\delta$ ). To find the maximum of equation (B35) we next assume that  $0 \leq g \leq \min(1, 1/\delta)$ .

For  $0 \leq g \leq \min(1, 1/\delta)$  equation (B35) is zero when  $g = g_0$  such that:

$$\delta(1-\gamma)g_0^2 + (2\gamma\delta - (1+\delta))g_0 + 1 - \gamma\delta\left(\frac{V_S}{\sigma_\theta^2} + 1\right) = 0. \quad (\text{B36})$$

We find:

$$g_0 = \begin{cases} 1 - \frac{V_S}{\sigma_\theta^2} \frac{\delta}{1-\delta}, & \text{for } \gamma = 1, \\ Q \pm \sqrt{Q^2 + P}, & \text{for } \gamma \neq 1. \end{cases} \quad (\text{B37})$$

Here,  $P = (\gamma\delta(V_S/\sigma_\theta^2 + 1) - 1)/(\delta(1-\gamma))$ , and  $Q = (1 + \delta(1 - 2\gamma))/(2\delta(1-\gamma))$ . To find under which conditions the solutions  $g_0$  to equation (B36) are maxima of equation (B32), we consider the following five different cases with respect to the parameters involved:

**Case 1:**  $\gamma = 1, \delta < \sigma_\theta^2/(\sigma_\theta^2 + V_S)$ . In this case, it follows that  $0 \leq 1 - \frac{V_S}{\sigma_\theta^2} \frac{\delta}{1-\delta} \leq 1$ , and hence a unique solution to equation (B36) on the interval  $[0, 1)$  exists. Furthermore, note that when  $\delta < \sigma_\theta^2/(\sigma_\theta^2 + V_S)$ , equation (B35) is positive as  $g \rightarrow 0^+$ . Thus, equation (B32) is increasing in a neighbourhood of 0, decreasing in a neighbourhood of 1, it has a unique point,  $g_0 = 1 - \delta V_S/(\sigma_\theta^2(1-\delta))$ , where the derivative is 0 (hereafter referred to as a *critical point*) on the interval  $[0, 1)$  and it is continuous. Using the extreme value theorem [84], it follows that  $g_0$  is a maximum.

**Case 2:**  $\gamma \neq 1$ ,  $\delta < 1$ ,  $\gamma\delta < \sigma_\theta^2/(\sigma_\theta^2 + V_S)$ . When  $\delta < 1$ , we find that  
 1158  $Q = (1 + \delta(1 - 2\gamma))/(2\delta(1 - \gamma)) \geq 1$ . Thus,  $Q + \sqrt{Q^2 + P} > 1$ , and so  
 1160  $Q + \sqrt{Q^2 + P}$  is not a solution to equation (B36) on the interval  $[0, 1)$  in this  
 case.

Therefore, there can be at most one solution,  $g_0$ , to equation (B36) such that  
 1162  $0 \leq g_0 \leq 1$ . Furthermore, when  $\gamma\delta < \sigma_\theta^2/(\sigma_\theta^2 + V_S)$  equation (B32) is increasing  
 in a neighbourhood to the right of 0. Because equation (B32) is increasing in a  
 1164 neighbourhood to the right of 0 and decreasing in a neighbourhood to the left  
 of 1, it must attain a maximum,  $g_0$ , such that  $0 < g_0 < 1$ . Thus, there is a  
 1166 unique solution,  $g_0 = Q - \sqrt{Q^2 + P}$ , on the interval  $[0, 1)$ .

**Case 3:**  $\gamma < 1$ ,  $\delta \geq 1$ ,  $\gamma\delta < \sigma_\theta^2/(\sigma_\theta^2 + V_S)$ . In this case, we first assume that  
 1168  $Q < 1/\delta$ . By re-ordering the terms in  $Q$ , this assumption can be re-written as:

$$1 + \delta(1 - 2\gamma) < 2(1 - \gamma). \quad (\text{B38})$$

1170 From this, it follows that  $\delta < 1$ . But, because in this case we assume  $\delta \geq 1$ , it  
 follows that  $Q \geq 1/\delta$ . This further implies that

$$1172 \quad Q + \sqrt{Q^2 + P} \geq Q \geq \frac{1}{\delta}, \quad (\text{B39})$$

meaning that  $Q + \sqrt{Q^2 + P}$  cannot be a solution to equation (B36) for  $0 \leq g <$   
 1174  $1/\delta$ . Thus, there can be at most one solution to equation (B36) for  $0 \leq g < 1/\delta$ .  
 Furthermore, equation (B32) is increasing in a neighbourhood to the right of  
 1176  $g = 0$  and decreasing as  $g \rightarrow 1/\delta^-$ , and therefore it must attain a maximum at  
 $g_0 = Q - \sqrt{Q^2 + P}$ .

1178 **Case 4:**  $\gamma \leq 1$ ,  $\delta \geq 1$ ,  $\gamma\delta \geq \sigma_\theta^2/(\sigma_\theta^2 + V_S)$ . In this case, we find

$$1180 \quad \frac{\partial}{\partial g} \bar{r}(\bar{u}_e(x), N_e(x), \bar{\theta}) = \frac{\sigma_\theta^2(1-g)}{V_S + \sigma_\theta^2(1-g)^2} - \frac{\gamma\delta}{1-\delta g} \leq$$

$$1182 \quad \frac{\sigma_\theta^2(1-g)}{V_S + \sigma_\theta^2(1-g)^2} - \frac{\sigma_\theta^2/(\sigma_\theta^2 + V_S)}{1-\delta g} \leq \frac{\sigma_\theta^2}{\sigma_\theta^2 + V_S} \left( \frac{1}{1-g} - \frac{1}{1-\delta g} \right) \leq 0. \quad (\text{B40})$$

Thus, the derivative is strictly non-positive for  $0 \leq g < 1/\delta$ . Hence, the maxi-  
 1184 mum of equation (B32) is attained at  $g = 0$ .

**Case 5:**  $\gamma > 1$ ,  $\delta < 1$ ,  $\gamma\delta \geq \sigma_\theta^2/(\sigma_\theta^2 + V_S)$ . As shown for Case 2 above,  
 1186 when  $\delta < 1$  it follows that  $Q \geq 1$ . As a consequence, equation (B36) can  
 have at most one solution,  $g_0$ , within the interval  $0 \leq g \leq 1$  (attained when  
 1188  $g_0 = Q - \sqrt{Q^2 + P}$ ). Because equation (B32) is decreasing in a neighbourhood  
 to the right of  $g = 0$  and decreasing as  $g \rightarrow 1^-$  a critical point for  $0 \leq g < 1$ , if  
 1190 it exists, must be an inflection point. Thus, the maximum of equation (B32) is  
 attained when  $g = 0$ .



1192 Thus, the optimal plasticity under spatially homogeneous but temporally  
heterogeneous conditions,  $g_f^*$ , is (cf. equation (B25)):

$$1194 \quad g_f^* = \begin{cases} 1 - \frac{V_S}{\sigma_\theta^2} \frac{\delta}{1-\delta}, & \text{for } \gamma = 1 \text{ and } \delta \leq \frac{\sigma_\theta^2}{\sigma_\theta^2 + V_S}, \\ Q - \sqrt{Q^2 + P}, & \text{for } \gamma \neq 1 \text{ and } \gamma\delta \leq \frac{\sigma_\theta^2}{\sigma_\theta^2 + V_S}, \\ 0, & \text{and } \gamma\delta \geq \frac{\sigma_\theta^2}{\sigma_\theta^2 + V_S}. \end{cases} \quad (\text{B41})$$

Note that the first- and second-case solutions in equation (B41) are consistent  
1196 because in the limit of  $\gamma \rightarrow 1$ , the second-case solution converges to the first-case  
solution, as expected, i.e.  $Q - \sqrt{Q^2 + P} \rightarrow 1 - \frac{V_S}{\sigma_\theta^2} \frac{\delta}{1-\delta}$  as  $\gamma \rightarrow 1$ .

1198 Equation (B41) was compared to plasticity attained at the end of our burn-in  
simulations (figures C2 and C9).

### 1200 B.3 When is plasticity of zero optimal?

In this subsection, we derive a condition for when the optimal plasticity is zero  
1202 in an environment where the optimal phenotype changes in space and fluctuates  
in time. Understanding when plasticity of zero is optimal for a population is of  
1204 specific interest because, in such cases, the ability to express and evolve plasticity  
yields no fitness benefit compared to when the capacity for plasticity is absent.  
1206 The average growth rate of an equilibrium population in a temporally static  
environment is given by equation (B15). When the optimal phenotype randomly  
1208 fluctuates in time (but the mean phenotype and the phenotypic variance of the  
local population are constant over time), the mean growth rate is reduced by  
1210 the additional load component  $\ln(1 + \sigma_\theta^2(1-g)/V_S)/2$  (subsection B2; see also  
[44]). The mean growth rate, averaged over time, for a population occupying an  
1212 environmental gradient with temporally fluctuating optimal phenotype is, thus,  
given by

$$1214 \quad \bar{r}(\bar{u}_e(x), N_e(x), \bar{\theta}(x)) = r_m \left( 1 - \frac{N_e(x)}{K} \right) - \frac{|1-g|b(x)\sigma}{2\sqrt{V_S}} - \\ 1216 \quad - \frac{1}{2} \ln \left( 1 + \frac{\sigma_\theta^2(1-g)^2}{V_S} \right) + \gamma \ln(1 - \delta|g|) - \frac{(\bar{u}_e(x) - \bar{\theta}(x))^2}{2V_S}. \quad (\text{B42})$$

The derivative of equation (B42) with respect to  $g$  is

$$\frac{\partial}{\partial g} \bar{r}(\bar{u}_e(x), N_e(x), \bar{\theta}(x)) = \text{sign}(1-g) \frac{b(x)\sigma}{2\sqrt{V_S}} + \\ + \frac{\sigma_\theta^2(1-g)}{V_S + \sigma_\theta^2(1-g)^2} - \text{sign}(g) \frac{\gamma\delta}{1 - \delta|g|} - \frac{\bar{\theta}(x)(\bar{u}_e(x) - \bar{\theta}(x))}{V_S}. \quad (\text{B43})$$

1218 As we found in subsection B2 for the special case when  $b(x) = 0$ , equation  
(B43) is strictly non-positive on the interval  $0 \leq g \leq \min(1, 1/\delta)$  when  $\gamma\delta \geq$

1220  $\sigma_\theta^2/(\sigma_\theta^2 + V_S)$ . The addition of the term  $b(x)\sigma/\sqrt{2V_S}$ , which is independent of  
 1221  $g$ , makes equation (B43) strictly non-positive when

$$\gamma\delta \geq \frac{b(x)\sigma}{2\sqrt{V_S}} + \frac{\sigma_\theta^2}{\sigma_\theta^2 + V_S}. \quad (\text{B44})$$

1222 Thus, at any local position  $x$  where inequality (B44) is satisfied, the mean pop-  
 1223 ulation growth rate is non-increasing as  $g$  increases from 0 to  $\min(1, 1/\delta)$  (and  
 1224 equation (B43) is zero only at isolated points, otherwise it is zero everywhere,  
 1225 so equation (B42) is decreasing except at isolated points), implying that the  
 1226 local optimal plasticity in such positions is equal to zero. Thus, at any local  
 1227 position  $x$  where inequality (B44) is satisfied, the local optimal plasticity is zero.  
 1228 Note that, when the fluctuations in the optimal phenotype are small, i.e., when  
 $\sigma_\theta^2 \ll V_S$ , the following holds:

$$\ln\left(1 + \frac{\sigma_\theta^2(1-g)^2}{V_S}\right) \approx \frac{\sigma_\theta^2(1-g)^2}{V_S}. \quad (\text{B45})$$

1230 In this case, equation (B44) may be approximated by

$$\gamma\delta \geq \frac{b(x)\sigma}{2\sqrt{V_S}} + \frac{\sigma_\theta^2}{V_S}. \quad (\text{B46})$$

In the next subsection, these results are used to determine the *critical cost*  
 1232 of plasticity, above which the ability to express and evolve plasticity is not  
 expected to facilitate local adaptation anywhere in the range of a population.

## 1234 **B.4 The effect of plasticity on the critical environmental 1235 gradient**

1236 In this subsection, the results derived above are used to find an approximate  
 1237 condition for when the ability to express and evolve plasticity increases the  
 1238 range of a population, compared to when plasticity is absent. As shown in [11],  
 a haploid population fails to adapt to the local environment when  $B_h(x) \gtrsim$   
 1240  $0.15N(x)\sigma\sqrt{s}$  (here, subscript  $h$  is used to indicate *haploid* populations), where

$$B_h(x) = \frac{b(x)\sigma}{\sqrt{2V_S}[r_m - b(x)\sigma/(2\sqrt{V_S})]} \quad (\text{B47})$$

1242 is the *effective environmental gradient*, and  $N(x)\sigma\sqrt{s}$  (where  $s = \alpha^2/(2V_S)$ ) is  
 the *efficacy of selection relative to drift*. For a diploid population with  $N(x)$   
 individuals, the population fails to adapt to the local environment when

$$B(x) \gtrsim 0.30N(x)\sigma\sqrt{s}. \quad (\text{B48})$$

1244 Note that the only difference to [11] is a factor of two in (B48) which accounts  
 for diploidy.

1246 in an environment where the optimal phenotype is temporally fluctuating,  
 the expected population size is reduced in comparison to the expected popula-  
 1248 tion size in static environments, due to the load component from the temporal  
 fluctuations,  $-\ln(1 + \sigma_\theta^2/V_S)/2$  (which may be approximated by  $-\sigma_\theta^2/(2V_S)$ )  
 1250 when  $\sigma_\theta^2 \ll V_S$ ). In this case, the population size is given by

$$N(x) = \exp\left(r_m\left(1 - \frac{N(x)}{K}\right) - \frac{\sigma b(x)}{2\sqrt{V_S}} - \frac{1}{2} \ln\left(1 + \frac{\sigma_\theta^2}{V_S}\right)\right). \quad (\text{B49})$$

This equation reiterates the results from [44] for the case when  $\bar{z}_e(x) = \bar{\theta}(x)$ .  
 1252 Thus, the composite parameter  $N(x)\sigma\sqrt{s}$  is given by

$$N(x)\sigma\sqrt{s} = K\left(1 - \frac{\sigma b(x)}{2\sqrt{V_S}r_m} - \frac{1}{2r_m} \ln\left(1 + \frac{\sigma_\theta^2}{V_S}\right)\right)\sigma\sqrt{s}. \quad (\text{B50})$$

To obtain an expression for the environmental gradient  $b_c$  above which local  
 adaptation fails (hereafter the *critical genetic gradient*) for a population without  
 the capacity for plasticity, we write the dimensionless parameters,  $B$  and  $N\sigma\sqrt{s}$ ,  
 in equation (B48) in terms of the (composite) parameters  $b(x)$ ,  $A$ ,  $E$ , and  $F$ ,  
 where

$$\begin{aligned} A &= 0.3\sqrt{2}K\sigma\sqrt{s}, \\ E &= \frac{2\sqrt{V_S}r_m}{\sigma}, \\ F &= \frac{1}{2} \ln\left(1 + \frac{\sigma_\theta^2}{V_S}\right). \end{aligned} \quad (\text{B51})$$

We find that the critical genetic gradient ( $b_c$ ) for a population without the ca-  
 1254 pacity for plasticity in temporally fluctuating environmental conditions is given  
 by:

$$b_c = E \frac{2 + 2A - AF - \sqrt{4 + 8A + 4AF + A^2F}}{2A}. \quad (\text{B52})$$

1256 In the absence of temporal fluctuations in the environmental conditions (i.e.,  
 when  $F = 0$ ) equation (B52) reduces to

$$b_c = E \frac{1 + A - \sqrt{1 + 2A}}{A}. \quad (\text{B53})$$

1258 Recall that in habitats with a spatially constant environmental gradient, a popu-  
 lation without the capacity for plasticity faces global extinction above the critical  
 1260 genetic gradient given by equation (B52) (or equation (B53) in static environ-  
 mental conditions), whereas it successfully expands and adapts to the entire  
 1262 habitat below the critical genetic gradient. Conversely, in habitats with a spa-  
 tially steepening environmental gradient, the critical genetic gradient (equations  
 1264 (B52)-(B53)) indicates the spatial position where, in the absence of plasticity,  
 adaptation fails and range expansion stops.

1266 Next, we turn to the model in which the expanding population has capacity  
 for plasticity (see model details in Appendix B1). For this model, we first seek

1268 a gradient below which plasticity of zero is optimal (hereafter called the *critical*  
 1270 *plasticity gradient*). Recall from equation (B44) that zero plasticity is optimal  
 at local environmental gradients  $b(x)$  such that:

$$b(x) \leq \frac{2\sqrt{V_S}\gamma\delta}{\sigma} - \frac{2\sigma_\theta^2\sqrt{V_S}}{\sigma(\sigma_\theta^2 + V_S)} = \frac{E\gamma\delta}{r_m} - E\frac{\sigma_\theta^2}{r_m(\sigma_\theta^2 + V_S)}. \quad (\text{B54})$$

Note that the RHS of equation (B54) scales linearly with  $\gamma\delta$ , that is, it increases  
 1272 linearly when increasing the cost of plasticity. Conversely, a positive value of  
 plasticity is optimal in positions where the environmental gradient  $b(x)$  is larger  
 1274 than the RHS of equation (B54). Thus, for a given cost of plasticity, there exists  
 a minimal gradient, i.e., the critical plasticity gradient ( $b_c^{(g)}$ ), above which the  
 1276 optimal plasticity is positive

$$b_c^{(g)} = \frac{E}{r_m} \left( \gamma\delta - \frac{\sigma_\theta^2}{\sigma_\theta^2 + V_S} \right). \quad (\text{B55})$$

Recall that for a population without the capacity for plastic response in  
 1278 the adaptive trait, a range margin forms when the environmental gradient is  
 equal to  $b_c$  given by equation (B52). For a population that has the capacity for  
 1280 plasticity, we have shown here that there is a critical plasticity gradient below  
 which zero plasticity is optimal. When the critical plasticity gradient is larger  
 1282 than  $b_c$ , plasticity in equilibrium is 0 at  $b_c$ , and at all shallower gradients. In  
 this case, thus, the population evolves as if it does not have the capacity for  
 1284 a plastic response in the adaptive trait. This is because, despite the fact that  
 the population has the capacity for plasticity, plasticity would not improve its  
 1286 fitness, and hence it does not evolve (or, if it evolves, it does so transiently and  
 it is not maintained). In other words, when the critical plasticity gradient ( $b_c^{(g)}$ )  
 1288 is steeper than the critical genetic gradient  $b_c$ , adaptation of the population fails  
 when  $b(x) = b_c$ , and the range of the population corresponds to that determined  
 1290 in [11]. Otherwise, when the critical plasticity gradient ( $b_c^{(g)}$ ) is shallower than  
 the critical genetic gradient ( $b_c$ ), the range of the population with the capacity  
 1292 for plasticity is larger than when plasticity is absent.

Note that the cost of plasticity in equation (B54) determines the value of the  
 1294 critical plasticity gradient. This implies that there is a critical cost of plasticity  
 $\delta_c$  for which the critical plasticity gradient equals the critical genetic gradient.  
 1296 To find this critical cost of plasticity ( $\delta_c$ ), we require that equation (B55) eval-  
 uated at  $\delta_c$  is equal to  $b_c$  (given by equation (B52)). Solving for  $\delta_c$  yields

$$\delta_c = \frac{1}{\gamma} \left( r_m \frac{2A + 2 - AF - \sqrt{4 + 8A + 4AF + A^2F}}{2A} + \frac{\sigma_\theta^2}{\sigma_\theta^2 + V_S} \right). \quad (\text{B56})$$

1298 In conclusion, we find that, when  $\delta > \delta_c$ , the population range-expansion  
 dynamics are within  $R_0$  regime (as per the notations used in the main text),  
 1300 i.e., the regime where the capacity to (potentially) evolve plasticity does not  
 increase the equilibrium range in comparison to when the capacity for plasticity  
 1302 is absent.

By contrast, when  $\delta < \delta_c$ , the equilibrium range may be larger when a  
1304 population has the capacity for plasticity, compared to a population that does  
not. In this case, there are two possibilities for the equilibrium range of the  
1306 population when plasticity may evolve: a finite but larger range compared to  
the case without the capacity for plasticity (regime  $R_1$  in the main text), or an  
1308 infinitely large range (accounted for by regime  $R_2$ , as explained next; and see  
main text).

A necessary but not sufficient condition for a parameter combination to  
1310 allow infinite range expansion is that the population can maintain a positive  
growth rate with a plasticity of 1, that is, when  $r_m > -\gamma \ln(1 - \delta)$  (equation  
1312 (B15)). If this inequality is not met, then there must be an upper limit to  
plasticity that may evolve. As a consequence, for a large enough steepness of the  
1314 environmental gradient, adaptation must fail. In other words, when  $\delta < \delta_c$  but  
1316  $r_m \leq -\gamma \ln(1 - \delta)$ , the parameters are in the  $R_1$  regime. Conversely, when  $\delta < \delta_c$   
and  $r_m > -\gamma \ln(1 - \delta)$ , the parameters are in the  $R_2$  regime. For parameters  
1318 within regime  $R_2$  the population may have an infinite range when the population  
attains the optimal plasticity of 1 in equilibrium, which may not always be the  
1320 case (recall that we only found a necessary but not sufficient condition for this  
to be true). For example, when the region of the environmental gradient where  
1322 intermediate values of plasticity are optimal is narrow and when dispersal is  
sufficiently strong relative to selection on plasticity, the allele frequencies for  
1324 plasticity may change slower across space than the optimal plasticity (using the  
arguments in [85] *albeit* in a model without plasticity). With this caution in  
1326 mind, we use  $r_m = -\gamma \ln(1 - \delta)$  to separate the  $R_1$  regime from the  $R_2$  regime,  
where infinite range expansion is possible either in this entire region, or in a  
1328 sub-region. Clearly, infinite range expansion is expected in the absence of any  
plasticity costs. This is because, in this case, all individuals may have plasticity  
1330 of 1 without any penalty, and with this attain perfect adaptation everywhere  
(assuming that the non-plastic component of the phenotype remains, on average,  
1332 the same as in the expansion source, i.e., 0).

We emphasise that the calculations in this appendix are based on a number  
1334 of simplifying assumptions. Among them is the assumption that plasticity is  
constant over time and locally in space (and that it is the same for all local indi-  
1336 viduals). When plasticity varies between individuals within a local population,  
the optimal population mean of plasticity may be different from the optimal  
1338 plasticity found above (as also found in our simulations, e.g. figures 3 C, C14).  
In addition, a potential covariance between plasticity and the non-plastic com-  
1340 ponent of genetic adaptation may alter the optimal population mean of plasticity  
but we neglected this here. Furthermore, as discussed above, dispersal  
1342 between neighbouring demes may alter the local population mean of plasticity.  
In conclusion, the local population mean of plasticity that a population attains  
1344 in the long run may not be equal to the optimal mean population plasticity ap-  
proximated here. But, despite this, our simulation and analytical results agree  
1346 relatively well (this is further discussed in the main text).

Importantly, when the cost of plasticity is above the critical cost, given by  
1348 equation (B56), the optimal plasticity is zero for all environmental gradients up

1350 to the critical genetic gradient as defined in [11]. As a consequence, dispersal  
does not alter plasticity in equilibrium, because it is expected to be the same  
(i.e., zero) in all demes. Furthermore, there is negligible covariance between  
1352 plasticity and the non-plastic component of genetic adaptation, because the  
variance in plasticity is expected to be low. In this case, our analysis shows that  
1354 the model outlined in the main text reduces to the model in [11] (see also [40]).  
Thus, equation (B56) gives an approximate condition for when the capacity for  
1356 plasticity cannot make the equilibrium range of the population larger than the  
range of a population without the capacity for plasticity.

1358 The results derived here guided our choice of the parameter values exam-  
ined in the individual-based model presented in the main text. Furthermore,  
1360 they aided the interpretation and qualitative understanding of our simulation  
results. The results from the individual-based model and their interpretation  
1362 are discussed in detail in the main text.

## Appendix C Additional simulation results

1364 In this appendix, we present additional simulation results that are relevant for  
the interpretation of our findings.

### 1366 C.1 Range expansion without plasticity

Figure C1 shows the population size 100,000 generations after the start of range  
1368 expansion for populations without the capacity for plasticity. When there were  
no temporal fluctuations in the optimal phenotype, we obtained the expected  
1370 results for range expansion without plasticity along steepening environmental  
gradients (figure C1 A) [40, 11, 41]. When the phenotypic optimum fluctuated  
1372 in time, the population size was reduced in comparison to when the phenotypic  
optimum was static (figures C1 B-D) in agreement with equation (B49) and  
1374 [14]. As a consequence of the reduced population size, the equilibrium range  
was reduced in comparison to the expectation in a temporally static environment  
1376 (purple crosses in figure C1).

### C.2 Static environment

1378 Here, we present the simulation results for range expansions where plasticity  
was allowed to evolve and the environmental conditions were temporally static.

1380 Figures C2-C4 show simulation results obtained at the end of the burn-in  
period for temporally static environments. In this case, plasticity was nearly  
1382 uniformly zero for all costs of plasticity examined (figure C2). The cline patterns  
for the loci coding for the non-plastic component of the phenotype were similar  
1384 to the expected clines in the absence of plasticity (compare black and red lines  
in figure C3). However, there was one locus that was almost fully heterozygous  
1386 in the centre of the habitat for all parameters (figure C3), even though the  
environmental gradient was zero in the centre. This is likely due to the fact that  
1388 the model had an odd number of loci, and thus a population that on average  
was perfectly adapted had to be heterozygous at one locus. The frequencies for  
1390 alleles coding for plasticity did not seem to have any obvious pattern (figure  
C4).

1392 Figure C5 shows the evolution of plasticity during range expansion for dif-  
ferent values of the plasticity cost parameters  $\delta$  and  $\gamma$ , and of the local carrying  
1394 capacity,  $K$ . When the cost of plasticity was above the critical cost of plasticity  
(see Results in the main text) almost no plasticity evolved throughout the range  
1396 (figures C5A-C), although low positive plasticity evolved in the range margin for  
cost parameters close to the critical cost (figure C5 C). By contrast, when the  
1398 cost of plasticity was below the critical cost of plasticity, high plasticity evolved  
during range expansion (figure C5 D). In this case, positive plasticity initially  
1400 evolved in the range margin, and thereafter plasticity started increasing towards  
the centre of the range.

1402 Figure C6 shows the population size and plasticity attained 100,000 genera-  
tions after the start of range expansion. The parameters in figure C6 correspond



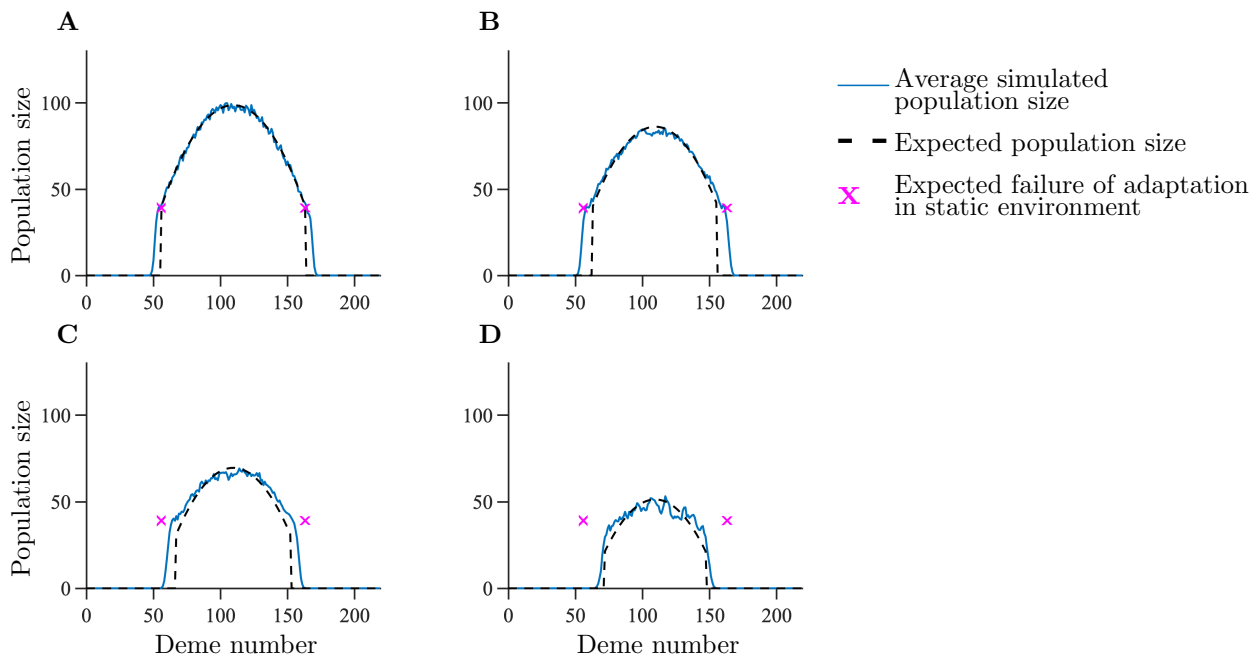

Figure C1: Average population size attained 100,000 generations after the start of range expansion for a population without the capacity for plasticity. The panels differ by the parameter  $\sigma_\theta$ :  $\sigma_\theta = 0$  (A),  $\sigma_\theta = \sqrt{2\alpha}$  (B),  $\sigma_\theta = \sqrt{5\alpha}$  (C),  $\sigma_\theta = \sqrt{10\alpha}$  (D). The blue line shows the realised population size 100,000 generations after the start of range expansion, averaged over 100 realisations. The black dashed line shows the population size given by equation (B49). The purple crosses indicate the expected failure of adaptation when  $\sigma_\theta = 0$ . Remaining parameters:  $K = 100$ ,  $r_m = 1$ ,  $V_S = 2$ ,  $\mu = 10^{-6}$ ,  $\sigma = 1$ .

1404 to those in figure C5. When the cost of plasticity was above the critical cost of  
 1405 plasticity, very little plasticity evolved, although a slightly increased plasticity  
 1406 occurred near the range margins (red line in figures C6 A-C). In all cases, the  
 1407 equilibrium population size agreed with the prediction in [11] (blue lines in C6  
 1408 A-C). Conversely, when the cost of plasticity was below the critical cost, high  
 1409 plasticity evolved towards the range margins (red line in figure C6 D). As a  
 1410 consequence, the population size reached a plateau (of about 60 individuals)  
 1411 approximately 50 demes before the edge of the habitat (blue line in figure C6 D;  
 1412 whereas, in the absence of plasticity, the population size would sharply decay  
 1413 towards zero approximately 50 demes before the edge of the habitat).

1414 In figure C7, the evolution of plasticity, as well as the population size and  
 1415 plasticity attained 200,000 generations after the start of range expansion is  
 1416 shown for  $\gamma = 0.25$ . The remaining parameters are the same as in figure 2  
 B in the main text. Figure C7 shows that, for smaller  $\gamma$  (i.e., more concave

1418 cost-related function), the range may be much larger than in the absence of  
1419 plasticity, even though the range is finite.

1420 Figure C8 shows an example of the spatial pattern of allele frequencies for  
1421 the alleles coding for the non-plastic component of the phenotype 100,000 gen-  
1422 erations after the start of range expansion. The spatial pattern of allele fre-  
1423 quencies for the alleles coding for the non-plastic component of the phenotype  
1424 corresponded to a series of staggered clines. These had the same width as the  
1425 clines for a population without the capacity for plasticity (compare the black  
1426 lines, corresponding to the simulation results, to the theoretical expectation  
1427 shown in red lines in figure C8 A). The spacing between the clines was, how-  
1428 ever, different to the expected spacing for a population without plasticity. As  
1429 for a population without the capacity for plasticity, the clines were sparse in the  
1430 centre of the habitat due to the shallow environmental gradient there. However,  
1431 the clines were also sparser in regions where plasticity was the main mechanism  
1432 for adaptation (compare the region between demes 10 and 50 in panel A to the  
1433 same region in panel B).

1434 When high plasticity evolved, the spatial pattern of allele frequencies for  
1435 alleles coding for plasticity formed cline-like patterns that were increasing from  
1436 the centre towards the edges on both sides, rather than increasing from one to  
1437 another edge (figure C8 B).

### 1438 C.3 Environment with optimum that fluctuates in time

1439 Here, we present the simulation results for range expansions where plasticity was  
1440 allowed to evolve and the environmental conditions were fluctuating in time.

1441 Figures C9-C11 show simulation results obtained at the end of the burn-in  
1442 period for temporally fluctuating environments. With temporal fluctuations in  
1443 the optimal phenotype, no (or very low) plasticity evolved when the cost of  
1444 plasticity was above the critical cost (figures C9 A, C9 B, and C9 D). How-  
1445 ever, plasticity evolved during the burn-in period when the cost of plasticity  
1446 was below the critical cost (C9 C, C9 E, F, G, H and C9 I). Note that plastic-  
1447 ity was approximately equally strong in all demes throughout the habitat (the  
1448 black lines in figure C9 are approximately straight and parallel to the  $x$ -axis).  
1449 In some cases (e.g., figures C9 C, C9 E, and C9 G), plasticity that evolved in  
1450 the simulations was slightly higher than expected from equation (B41). This is  
1451 possibly because equation (B41) relies on the assumption of a spatially homo-  
1452 geneous environment, whereas the habitat contains a (shallow) environmental  
1453 gradient during the burn-in period. In these cases, the joint effect of spatial  
1454 and temporal variability may cause the optimal plasticity to be positive (rather  
1455 than zero, as expected from temporal fluctuations alone). The spatial patterns  
1456 of allele frequencies for the alleles coding for the non-plastic component of the  
1457 phenotype were more noisy than for static environments (figure C10; compare  
1458 to figure C3). As for when the environmental conditions were static, there was  
1459 no evident spatial pattern in the allele frequencies for plasticity (figure C11).

1460 Figure C12 shows the evolution of plasticity during range expansion in the  
1461 presence of temporal fluctuations of the optimal phenotype. As expected from

1462 equation (B49), when the cost of plasticity was above the critical cost, the  
1464 range was smaller than the equilibrium range in temporally static environments  
(figures C12 A, C12 C, and C12 E). By contrast, when the cost of plasticity was  
1466 below the critical cost, temporal fluctuations, instead, increased the range ((and  
range expansion was faster when temporal fluctuations were larger; compare  
panels B, D, and F in figure C12).

1468 Figure C13 shows the population size and plasticity attained 100,000 gen-  
erations after the start of range expansion. The parameters in figure C13 corre-  
1470 spond to those in figure C12. When the cost of plasticity was above the critical  
cost, almost no plasticity had evolved 100,000 generations after the start of  
1472 range expansion (red lines in figures C13 A, C13 C, and C13 E). In this case,  
the population size and the range were decreased, in comparison to the expected  
1474 population size and range for temporally static environmental conditions (blue  
line in figures C13 A, C13 C and C13). By contrast, high plasticity evolved when  
1476 the cost of plasticity was below the critical cost (red lines in figures C13 B, C13  
D, and C13). In this case, the population size was almost constant throughout  
1478 the habitat as expected due to the high plasticity (blue lines in figures C13 B,  
C13 D, and C13 F).

#### 1480 C.4 Additional simulations

In figure C14, the population size and plasticity attained 200,000 generations  
1482 after the start of range expansion are shown in a habitat with a phenotypic  
optimum that changes linearly in space. The gradient is such that the optimal  
1484 plasticity according to equation (B25) is equal to  $g_e^* = 0.82$ . Notably, there  
is a shallow gradient in plasticity 200,000 generations after the start of range  
1486 expansion. This gradient is likely caused, in part, due to stronger selection  
on plasticity along an environmental gradient (cf. [23]), together with edge  
1488 effects caused by the finite number of loci used in the simulations. Although  
the gradient in plasticity may be a transient effect and plasticity may level out  
1490 in a longer run (as argued in [25]), the results in figure C14 indicate that the  
fitness benefit to further decrease plasticity in the edges or increase it in the  
1492 centre is too weak to reach the optimal plasticity within 200,000 generations.

In figure C15, the evolution of plasticity and the population size and plastic-  
1494 ity attained 100,000 generations after the start of range expansion is shown for  
the same parameter values as in figure 2 B, except that here the number of loci  
1496 underlying plasticity was smaller, and the magnitude of the allele effect sizes at  
these loci was proportionately larger (details in Methods in the main text). In  
1498 this case, much higher plasticity evolves at the range margin (compare figure  
C15 to figure 2 B). This is because, due to larger effect sizes at loci underlying  
1500 plasticity, selection per locus is stronger in the case shown in figure C15 than  
in figure 2. This favours the evolution of higher plasticity in the range margin,  
1502 where the population experiences continued directional selection to restore the  
mean phenotype to the local optimum [9]. However, despite stronger selection  
1504 for plasticity, there is a limit to the amount of plasticity that can evolve and  
the range expansion dynamics fall within regime  $R_1$ , as our analytical analysis

<sup>1506</sup> shows.

These and other results we obtained are further discussed in the main text.

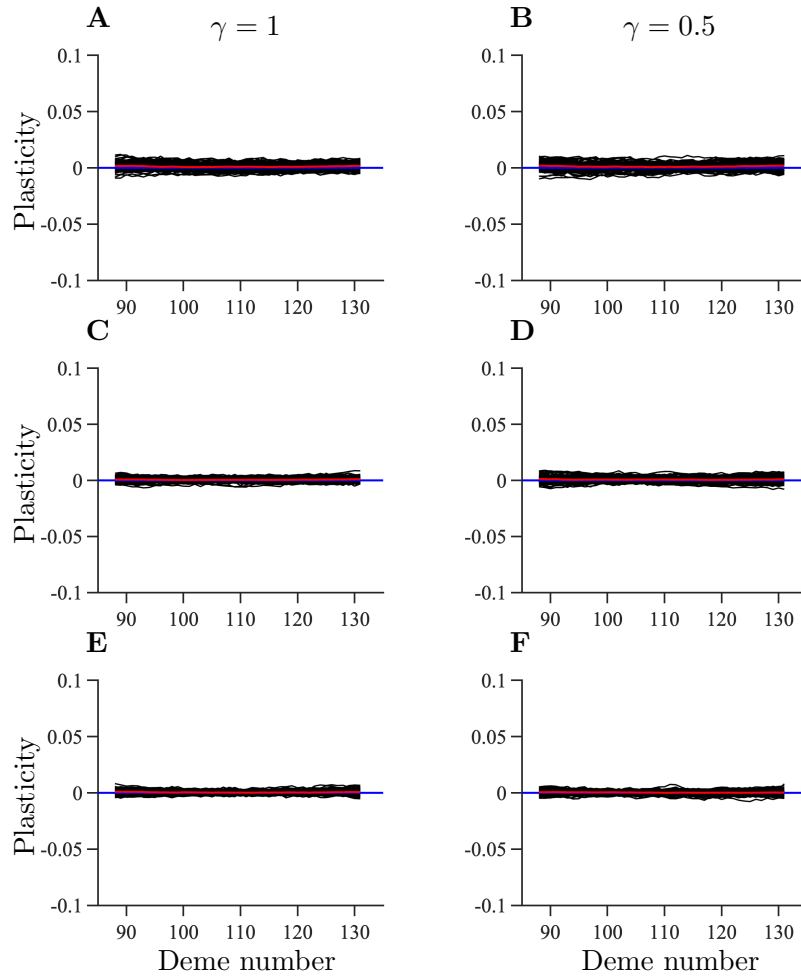

Figure C2: Average plasticity in static environments at the end of the burn-in period. The panels differ by the parameters  $\gamma$  and  $\delta$ :  $\gamma = 1$ ,  $\delta = 0.25$  (A),  $\gamma = 0.5$ ,  $\delta = 0.5$  (B),  $\gamma = 1$ ,  $\delta = 0.6$  (C),  $\gamma = 0.5$ ,  $\delta = 0.9$  (D),  $\gamma = 1$ ,  $\delta = 0.75$  (E), and  $\gamma = 0.5$ ,  $\delta = 1.35$  (F). The black lines show the population-average plasticity for individual realisations. The red line shows the total average over 100 realisations. The blue line shows the analytically calculated plasticity in equilibrium in an environment that is spatially homogeneous. Remaining parameters:  $K = 100$ ,  $r_m = 1$ ,  $V_S = 2$ ,  $\mu = 10^{-6}$ ,  $\sigma = 1$ ,  $L = 799$ ,  $\alpha = 0.3162$ ,  $\beta = 0.0013$ , and  $\sigma_\theta = 0$ . In each case 100 realisations were performed.

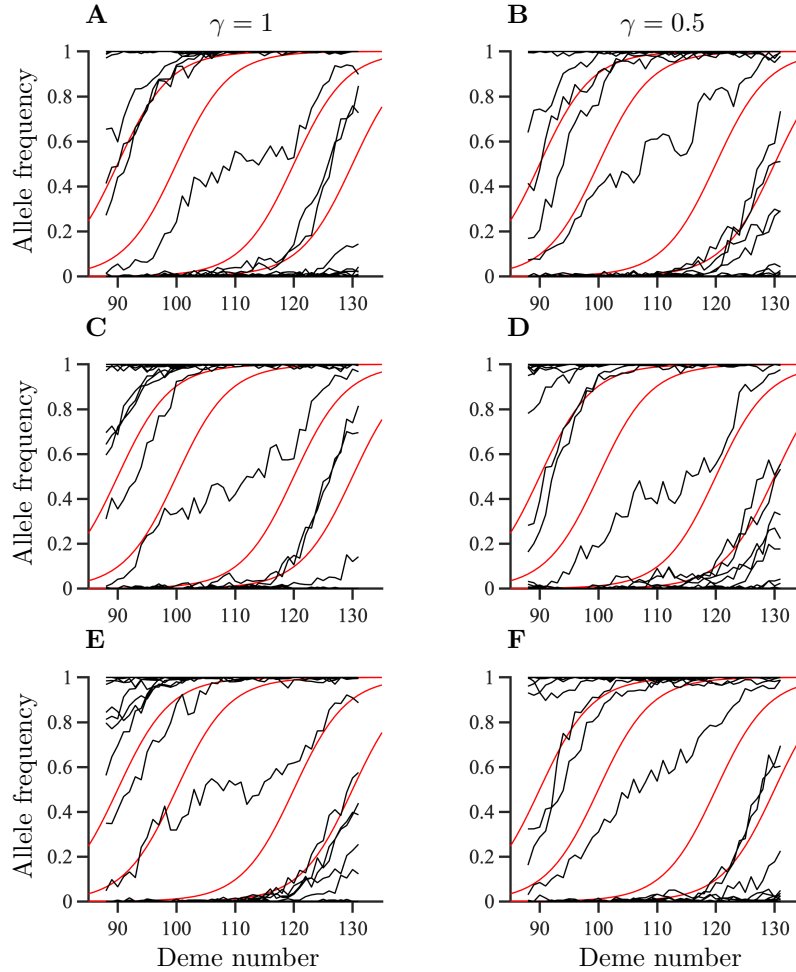

Figure C3: Spatial patterns of allele frequencies for the non-plastic component of the phenotype in static environments at the end of the burn-in period for single randomly chosen realisations. The parameters shown in panel A-F correspond to those in figure C2. The black lines show the realised allele frequencies for the alleles coding for the non-plastic component of the phenotype. The red lines show illustrative examples of theoretically expected clines in allele frequencies:  $p_{z,j} = 1/(1 + \exp(-4(x - c_j)/w))$ , where  $w = 4\sigma\sqrt{V_S}/\alpha$ , and  $x$  and  $c_j$  denote the spatial position and the centre of the cline, respectively. Here, the centres of the clines are located in demes 90, 100, 120, and 130.

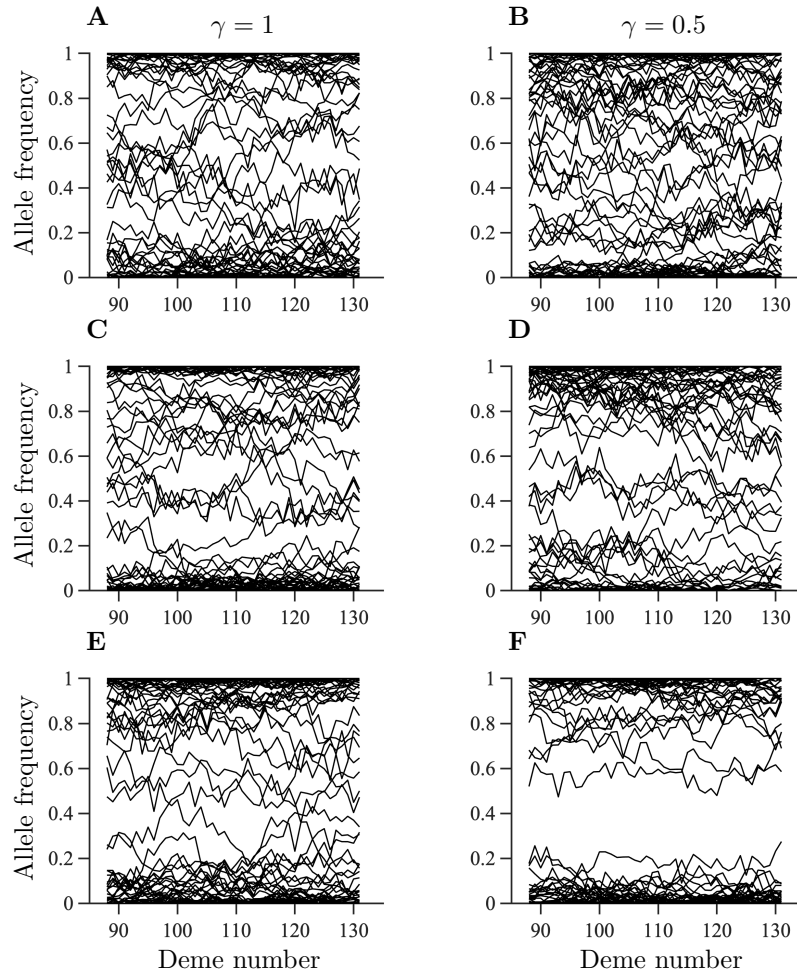

Figure C4: Spatial patterns of allele frequencies for the alleles coding for plasticity in static environments at the end of the burn-in period for single randomly chosen realisations. The parameters shown in panel A-F correspond to those in figure C2.

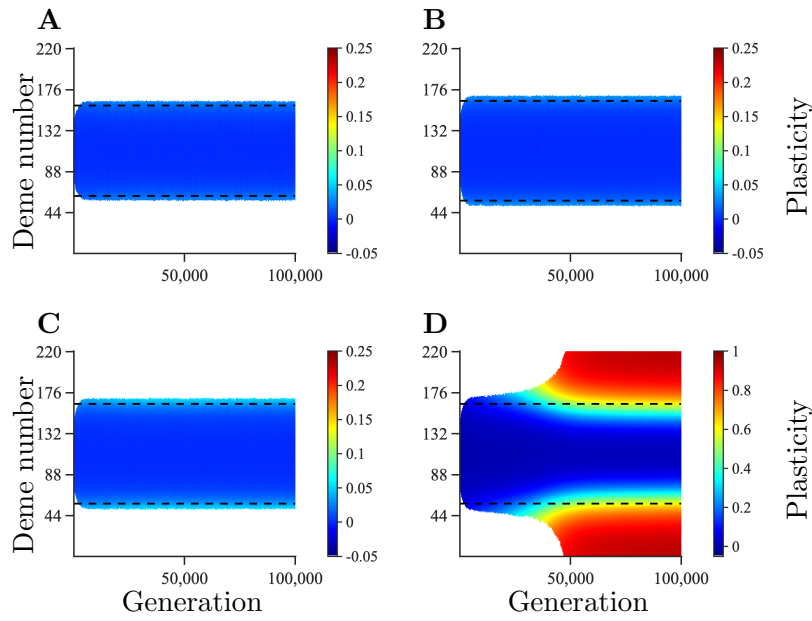

Figure C5: Temporal and spatial evolution of plasticity averaged over 100 realisations during range expansion in a habitat with temporally static environmental conditions. The dashed lines denote where adaptation is expected to fail for a population without plasticity. The panels differ by the parameter  $\delta$  and  $K$ :  $\delta = 0.5$ ,  $K = 50$  (A),  $\delta = 0.75$ ,  $K = 100$  (B),  $\delta = 0.6$ ,  $K = 100$  (C), and  $\delta = 0.25$ ,  $K = 100$  (D). Remaining parameters:  $r_m = 1$ ,  $V_S = 2$ ,  $\mu = 10^{-6}$ ,  $\sigma = 1$ ,  $L = 799$ ,  $\alpha = 0.3162$ ,  $\beta = 0.0013$ ,  $\gamma = 1$ , and  $\sigma_\theta = 0$ .



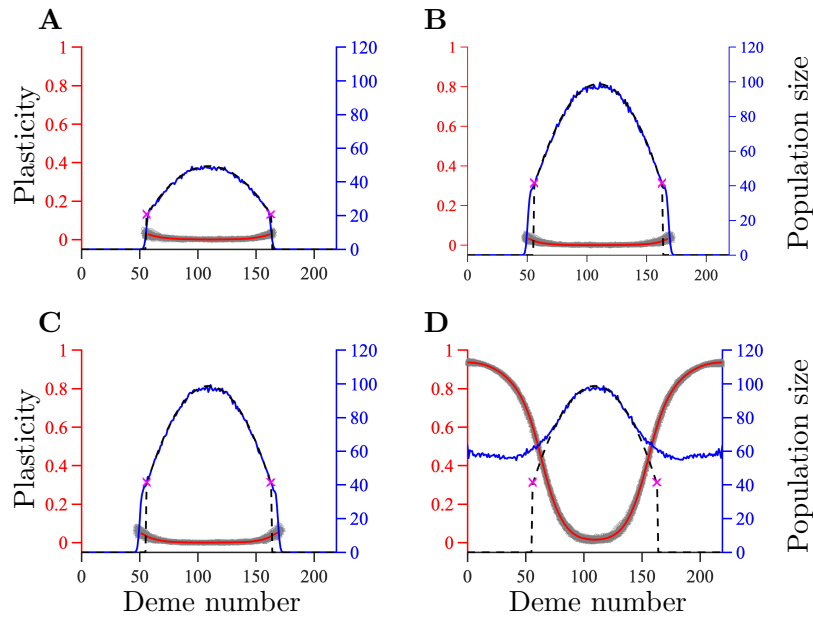

Figure C6: Population size and plasticity 100,000 generations after the start of range expansion in a habitat with temporally static environmental conditions. The results in panels A-D corresponds to those in panels A-D in figure C5, respectively. The red axis and red line show plasticity averaged over 100 realisations, the grey area indicates the spread of plasticity values obtained in different realisations. The blue axis and blue line show the population size, averaged over 100 realisations. The expected population size, and the deme where adaptation is expected to fail in the absence of plasticity are shown by the dashed line, and purple crosses, respectively.

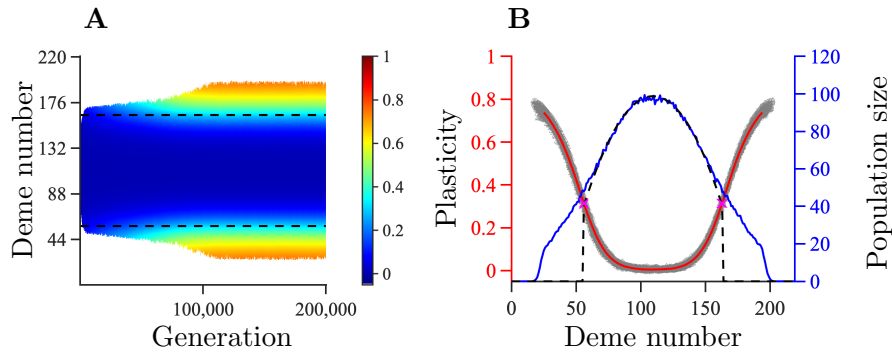

Figure C7: Range expansion in a habitat with temporally static environmental conditions and shape parameter  $\gamma = 0.25$  for the function related to the cost of plasticity. Temporal and spatial evolution of plasticity averaged over 100 realisations during range expansion (A). Population size and plasticity 200,000 generations after the start of range expansion (B). The dashed lines in panel A denote where adaptation is expected to fail for a population without plasticity. The red axis and red line in panel B show plasticity averaged over 100 realisations, the grey area indicates the spread of plasticity values obtained in different realisations. The blue axis and blue line show the population size, averaged over 100 realisations. The expected population size, and the expected failure of adaptation in the absence of plasticity are shown by the dashed line, and purple crosses, respectively. Remaining parameters:  $K = 100$ ,  $r_m = 1$ ,  $V_S = 2$ ,  $\mu = 10^{-6}$ ,  $\sigma = 1$ ,  $L = 799$ ,  $\alpha = 0.3162$ ,  $\beta = 0.0013$ ,  $\delta = 1.1$ , and  $\sigma_\theta = 0$ .

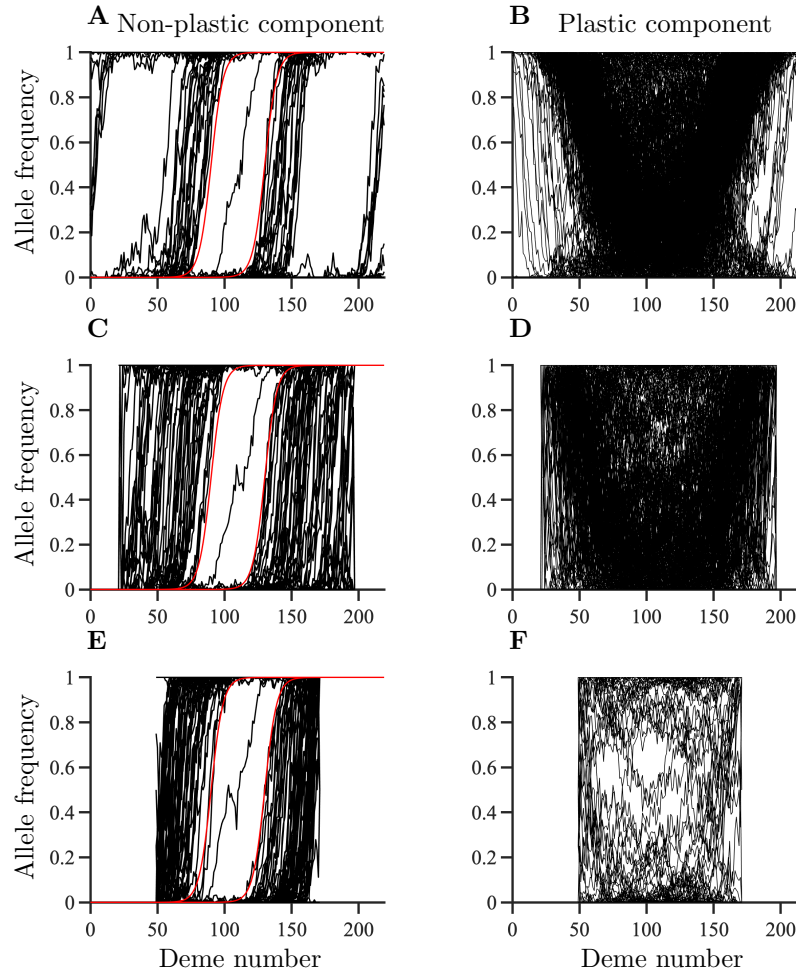

Figure C8: Examples of spatial patterns of allele frequencies for alleles coding for the non-plastic component of the phenotype (A, C, and E) and plasticity (B, D, and F). The parameters in panel A-B correspond to those in figures C5 D and C6 D (cost parameters  $\gamma = 1$ ,  $\delta = 0.25$ ). The parameter values in panel C-D correspond to those in figure C7 (cost parameters  $\gamma = 0.25$ ,  $\delta = 1.1$ ). The parameters in panel E-F correspond to those in figures C5 A and C6 A (cost parameters  $\gamma = 1$ ,  $\delta = 0.75$ ). The allele frequencies shown in this figure were recorded 100,000 generations after the start of range expansion for a single randomly chosen realisation. Black lines show realised allele frequencies. Two examples of analytical predictions for a cline,  $p_{z,j}(x) = 1/(1+\exp(-4(x-c_j)/w))$  (where  $x$  denotes spatial position,  $c_j$  denotes the centre of the cline, and  $w = 4\sigma\sqrt{V_S}/\alpha$ ), are shown in red in panel A, C and E. Remaining parameters:  $K = 100$ ,  $r_m = 1$ ,  $V_S = 2$ ,  $\mu = 10^{-6}$ ,  $\sigma = 1$ ,  $L = 799$ ,  $\alpha = 0.3162$ ,  $\beta = 0.0013$ , and  $\sigma_\theta = 0$ .

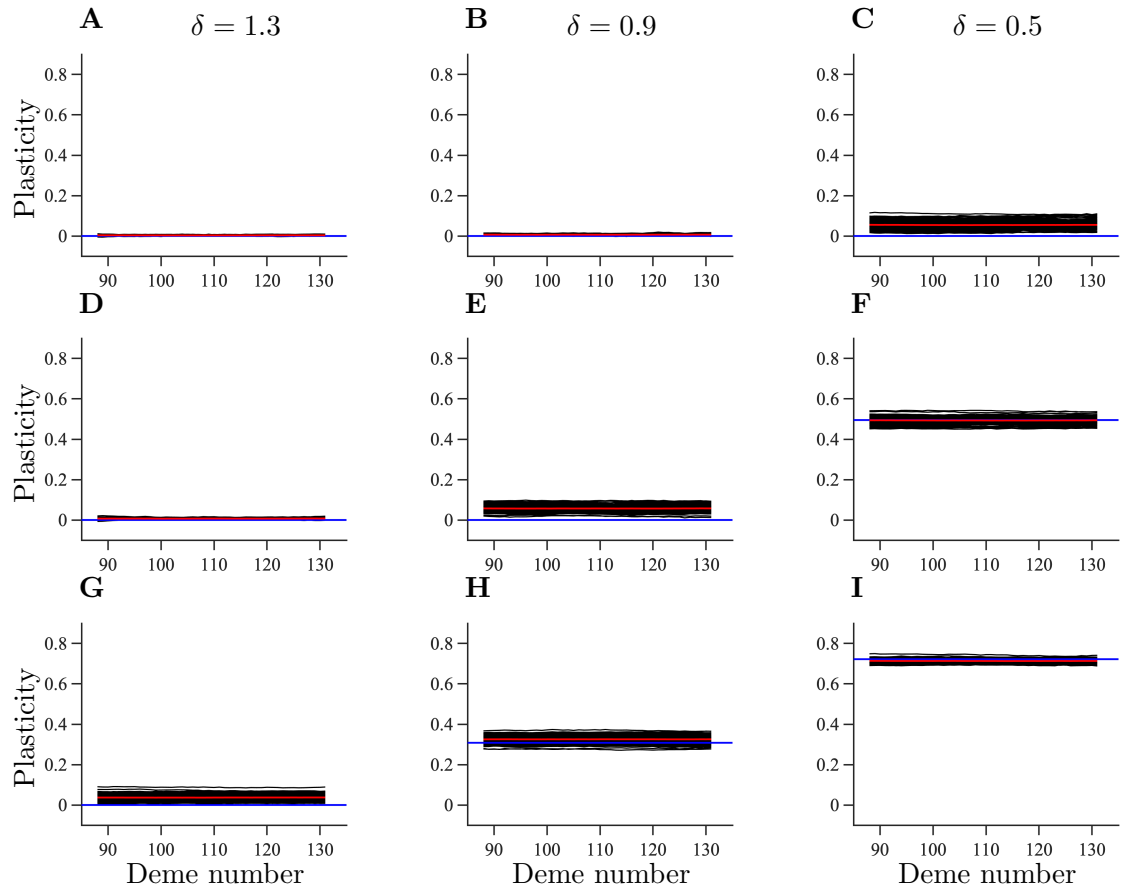

Figure C9: Plasticity at the end of the burn-in period in temporally fluctuating environments. The panels differ by the parameters  $\sigma_\theta$  and  $\delta$ :  $\sigma_\theta = \sqrt{2\alpha}$ ,  $\delta = 1.3$  (A),  $\sigma_\theta = \sqrt{2\alpha}$ ,  $\delta = 0.9$  (B),  $\sigma_\theta = \sqrt{2\alpha}$ ,  $\delta = 0.5$  (C),  $\sigma_\theta = \sqrt{5\alpha}$ ,  $\delta = 1.3$  (D),  $\sigma_\theta = \sqrt{5\alpha}$ ,  $\delta = 0.9$  (E),  $\sigma_\theta = \sqrt{5\alpha}$ ,  $\delta = 0.5$  (F),  $\sigma_\theta = \sqrt{10\alpha}$ ,  $\delta = 1.3$  (G),  $\sigma_\theta = \sqrt{10\alpha}$ ,  $\delta = 0.9$  (H), and  $\sigma_\theta = \sqrt{10\alpha}$ ,  $\delta = 0.5$  (I). Refer to the caption of figure C2 for an explanation of what the different lines represent. All panels in this figure have  $\gamma = 0.5$ . Remaining parameters are the same as in figure C2.

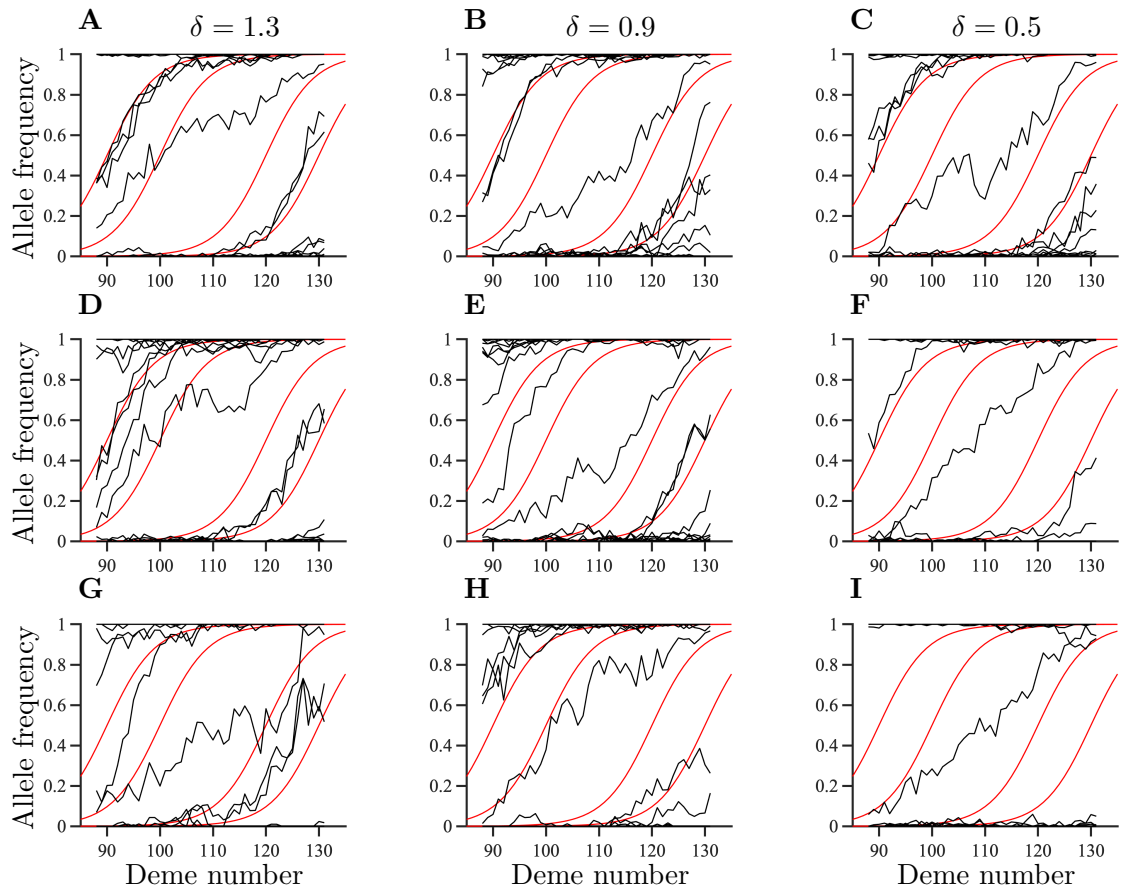

Figure C10: Spatial patterns of allele frequencies for the non-plastic component of the phenotype in temporally fluctuating environments at the end of the burn-in period for single randomly chosen realisations. The parameters shown in panel A-I correspond to those in figure C9. Refer to the caption of figure C3 for an explanation of what the different lines represent.

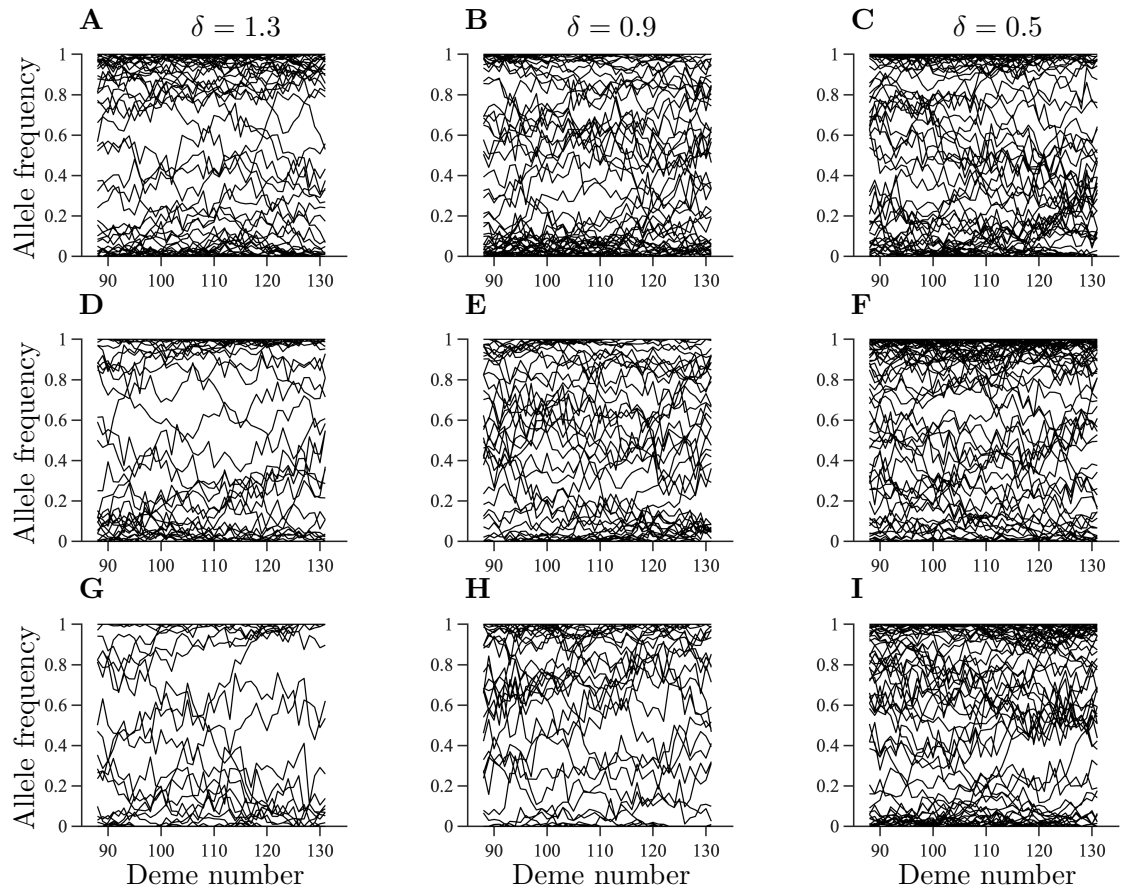

Figure C11: Spatial patterns of allele frequencies for the alleles coding for plasticity in temporally fluctuating environments at the end of the burn-in for single randomly chosen realisations. The parameters shown in panel A-I correspond to those in figure C9. Refer to the caption of figure C4 for an explanation of what the lines represent.

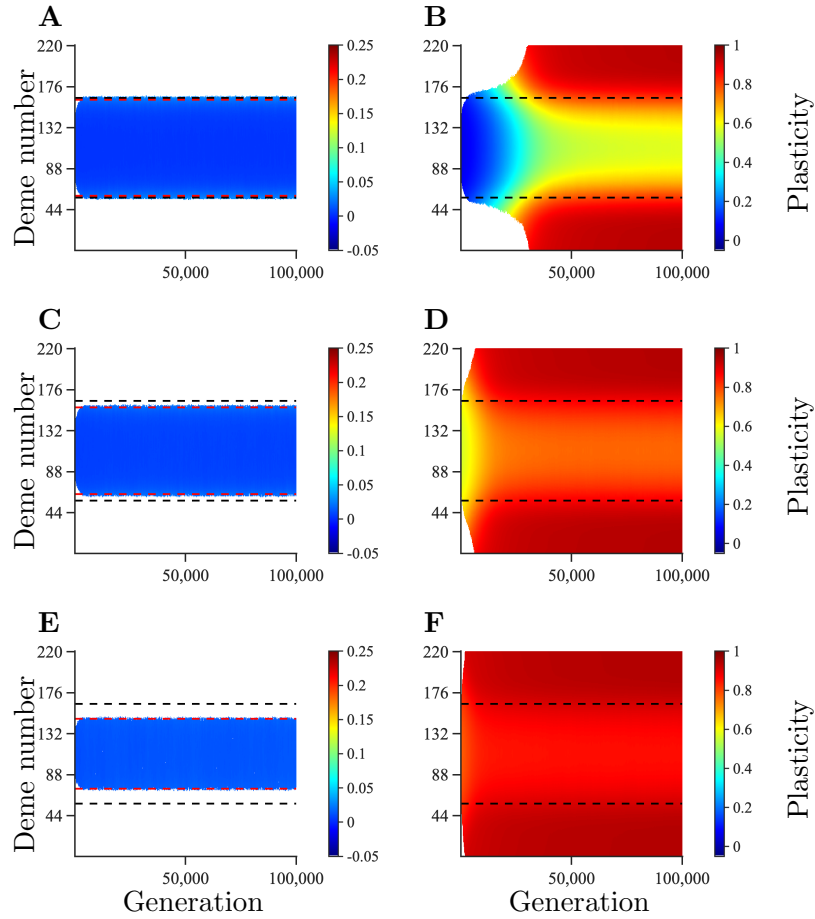

Figure C12: Temporal and spatial evolution of plasticity averaged over 100 realisations during range expansion in a habitat with temporally fluctuating environmental conditions. For comparison, the black dashed lines denote where adaptation is expected to fail for a population without plasticity in a temporally static environment. The red dashed lines show the expected failure of adaptation for a population without plasticity in a temporally fluctuating environment. The panels differ by the parameters  $\delta$  and  $\sigma_\theta$ :  $\delta = 0.75$ ,  $\sigma_\theta = \sqrt{2\alpha}$  (A),  $\delta = 0.25$ ,  $\sigma_\theta = \sqrt{2\alpha}$  (B),  $\delta = 0.75$ ,  $\sigma_\theta = \sqrt{5\alpha}$  (C),  $\delta = 0.25$ ,  $\sigma_\theta = \sqrt{5\alpha}$  (D),  $\delta = 0.75$ ,  $\sigma_\theta = \sqrt{10\alpha}$  (E), and  $\delta = 0.25$ ,  $\sigma_\theta = \sqrt{10\alpha}$  (F). Remaining parameters:  $K = 100$ ,  $r_m = 1$ ,  $V_S = 2$ ,  $\mu = 10^{-6}$ ,  $\sigma = 1$ ,  $L = 799$ ,  $\alpha = 0.3162$ ,  $\beta = 0.0013$ , and  $\gamma = 1$ .

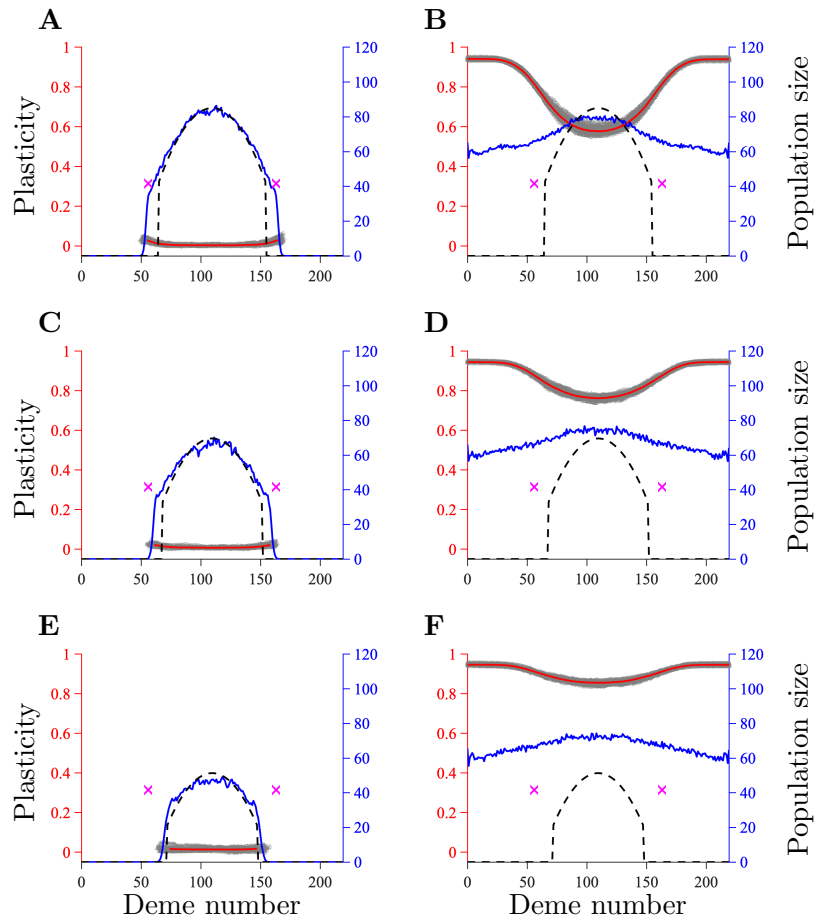

Figure C13: Population size and plasticity 100,000 generations after the start of range expansion in a habitat with temporally fluctuating environmental conditions. The results in panels A-F correspond to those in panels A-F in figure C12, respectively. The expected population size for temporally fluctuating environmental conditions without plasticity (equation (B49)) is shown by the dashed line. For comparison, purple crosses denote the expected failure of adaptation in static environments in the absence of plasticity. Refer to the caption of figure C6 for an explanation of what the remaining lines represent.



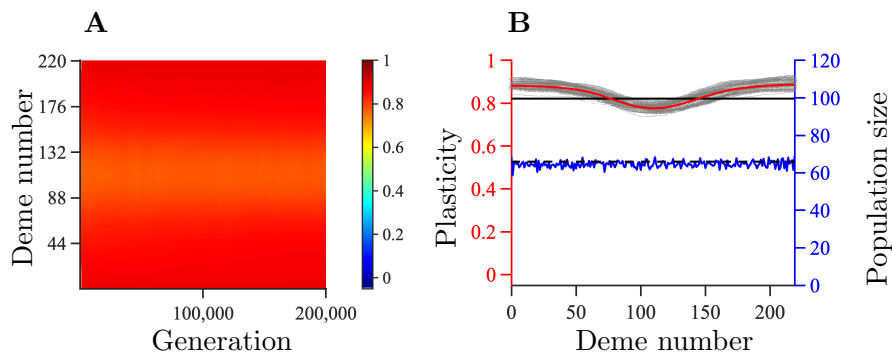

Figure C14: Evolution of plasticity in a habitat with an optimal phenotype that changes linearly in space. Temporal and spatial evolution of plasticity averaged over 100 realisations (A). Population size and plasticity 200,000 generations after the start of range expansion (B). The red line in panel B shows plasticity averaged over 20 realisations (red axis on the left). The grey area indicates the spread of plasticity between different realisations. The solid black line shows the analytically calculated optimal plasticity. The blue line shows the population size averaged over 20 realisations (blue axis on the right). The black dashed line shows the expected population size for the analytically calculated optimal plasticity (it is overlaid by the solid blue line, indicating good agreement between the simulation and the analytical approximation). Remaining parameters:  $\theta = 1.2(i - 110.5)$ ,  $K = 100$ ,  $r_m = 1$ ,  $V_S = 2$ ,  $\mu = 10^{-6}$ ,  $\sigma = 1$ ,  $L = 415$ ,  $\alpha = 0.3162$ ,  $\beta = 0.0024$ ,  $\gamma = 0.5$ ,  $\delta = 0.5$ , and  $\sigma_\theta = 0$ .

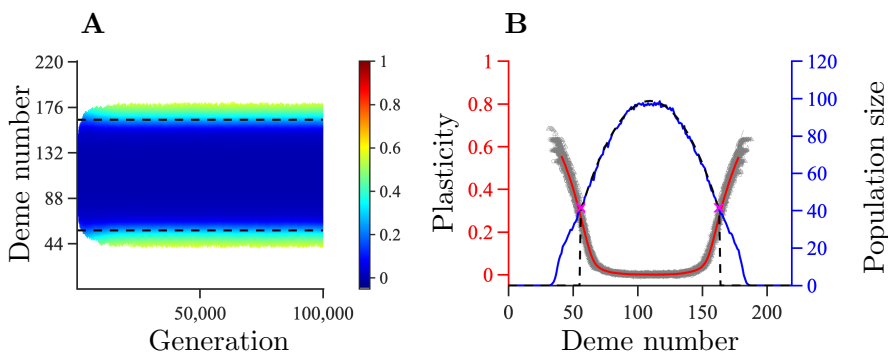

Figure C15: Simulations with the number of loci underlying the plastic component of the trait ( $L_2$ ) being ten times smaller than the number of loci underlying the non-plastic component of the trait ( $L_1$ ). Consequently, and in comparison to the results presented in the main text, the allele effect sizes at loci underlying plasticity are here ten times larger than the alleles underlying plasticity in the results presented in the main text. Besides this, all other parameter values correspond to the parameter values shown in figure 2 B. In this case, plasticity that evolves in the range margin is much higher (plasticity of 0.5-0.6) than in the case shown in figure 2 B (plasticity of 0.1). However, because the parameters are within regime  $R_1$ , the equilibrium range is finite. Panel A: temporal and spatial evolution of plasticity averaged over 100 realisations. Panel B: population size and plasticity 100,000 generations after the start of range expansion. Refer to the captions to figures C5 and C6 for explanations of the different lines in panels A and B, respectively. Parameters:  $K = 100$ ,  $r_m = 1$ ,  $V_S = 2$ ,  $\mu = 10^{-6}$ ,  $\sigma = 1$ ,  $L_1 = 799$ ,  $L_2 = 79$ ,  $\alpha = 0.3162$ ,  $\beta = 0.013$ ,  $\gamma = 0.5$ , and  $\delta = 0.9$ .

## 1508 References

- 1510 [1] Sirois-Delisle C, Kerr JT. 2018 Climate change-driven range losses among  
bumblebee species are poised to accelerate. Scientific Reports **8**, 1–10.
- 1512 [2] Pinsky ML, Selden RL, Kitchel ZJ. 2020 Climate-Driven Shifts in Marine  
Species Ranges: Scaling from Organisms to Communities. Annual Review  
of Marine Science **12**, 153–179.
- 1514 [3] Hastings RA, Rutterford LA, Freer JJ, Collins RA, Simpson SD, Genner  
MJ. 2020 Climate change drives poleward increases and equatorward de-  
1516 clines in marine species. Current Biology **30**, 1572–1577.
- [4] O’Hara CC, Frazier M, Halpern BS. 2021 At-risk marine biodiversity faces  
1518 extensive, expanding, and intensifying human impacts. Science **372**, 84–87.
- [5] Yan HF, Kyne PM, Jabado RW, Leeney RH, Davidson LN, Derrick DH,  
1520 Finucci B, Freckleton RP, Fordham SV, Dulvy NK. 2021 Overfishing and  
habitat loss drive range contraction of iconic marine fishes to near extinc-  
1522 tion. Science Advances **7**, eabb6026.
- [6] Bridle JR, Vines TH. 2007 Limits to evolution at range margins: when and  
1524 why does adaptation fail?. Trends in Ecology & evolution **22**, 140–147.
- [7] Sexton JP, McIntyre PJ, Angert AL, Rice KJ. 2009 Evolution and ecol-  
1526 ogy of species range limits. Annual Review of Ecology, Evolution, and  
Systematics **40**, 415–436.
- 1528 [8] Kirkpatrick M, Barton NH. 1997 Evolution of a species’ range. American  
Naturalist **150**, 1–23.
- 1530 [9] Chevin LM, Lande R. 2011 Adaptation to marginal habitats by evolution of  
increased phenotypic plasticity. Journal of evolutionary biology **24**, 1462–  
1532 1476.
- [10] Barton NH. 2001 Adaptation at the edge of a species’ range. In Silvertown  
1534 J, Antonovics J, editors, Integrating ecology and evolution in a spatial  
context vol. 14 pp. 365–392. Oxford: Blackwell.
- 1536 [11] Polechová J, Barton NH. 2015 Limits to adaptation along environmental  
gradients. Proceedings of the National Academy of Sciences **112**, 6401–  
1538 6406.
- [12] Sgro CM, Terblanche JS, Hoffmann AA. 2016 What can plasticity  
1540 contribute to insect responses to climate change?. Annual Review of  
Entomology **61**, 433–451.
- 1542 [13] Coulson T, Kendall BE, Barthold J, Plard F, Schindler S, Ozgul A, Gaillard  
JM. 2017 Modeling adaptive and nonadaptive responses of populations to  
1544 environmental change. The American Naturalist **190**, 313–336.

- 1546 [14] Chevin LM, Hoffmann AA. 2017 Evolution of phenotypic plasticity in extreme environments. Philosophical Transactions of the Royal Society B: Biological Sciences **372**, 20160138.
- 1548 [15] Fox RJ, Donelson JM, Schunter C, Ravasi T, Gaitán-Espitia JD. 2019 Beyond buying time: the role of plasticity in phenotypic adaptation to rapid  
1550 environmental change. Philosophical Transactions of the Royal Society B: Biological Sciences **374**, 20180174.
- 1552 [16] Scheiner SM, Barfield M, Holt RD. 2020 The genetics of phenotypic plasticity. XVII. Response to climate change. Evolutionary Applications **13**,  
1554 388–399.
- [17] Johansson D, Pereyra RT, Rafajlović M, Johannesson K. 2017 Reciprocal  
1556 transplants support a plasticity-first scenario during colonisation of a large  
hyposaline basin by a marine macro alga. BMC Ecology **17**, 1–9.
- 1558 [18] Wang SP, Althoff DM. 2019 Phenotypic plasticity facilitates initial colonization of a novel environment. Evolution **73**, 303–316.
- 1560 [19] Storz JF, Scott GR. 2020 Phenotypic plasticity, genetic assimilation, and  
genetic compensation in hypoxia adaptation of high-altitude vertebrates.  
1562 Comparative Biochemistry and Physiology Part A: Molecular & Integrative  
Physiology p. 110865.
- 1564 [20] Walter GM, Clark J, Terranova D, Cozzolino S, Cristaudo A, Hiscock SJ,  
Bridle JR. 2020 Hidden genetic variation in plasticity increases the potential  
1566 to adapt to novel environments. bioRxiv.
- [21] Enbody ED, Pettersson ME, Sprehn CG, Palm S, Wickström H, Andersson  
1568 L. 2021 Ecological adaptation in European eels is based on phenotypic  
plasticity. Proceedings of the National Academy of Sciences **118**.
- 1570 [22] Walter GM, Terranova D, Clark J, Cozzolino S, Cristaudo A, Hiscock SJ,  
Bridle JR. 2021 Plasticity in novel environments induces larger changes in  
1572 genetic variance than adaptive divergence. bioRxiv.
- [23] Tufto J. 2000 The evolution of plasticity and nonplastic spatial and temporal  
1574 adaptations in the presence of imperfect environmental cues. The  
American Naturalist **156**, 121–130.
- 1576 [24] Scheiner SM. 2016 Habitat choice and temporal variation alter the balance  
between adaptation by genetic differentiation, a jack-of-all-trades strategy,  
1578 and phenotypic plasticity. American Naturalist **187**, 633–646.
- [25] Schmid M, Dallo R, Guillaume F. 2019 Species' range dynamics affect  
1580 the evolution of spatial variation in plasticity under environmental change.  
American Naturalist **193**, 798–813.

- 1582 [26] Chevin LM, Lande R, Mace GM. 2010 Adaptation, plasticity, and extinction  
1584 in a changing environment: towards a predictive theory. PLoS Biology  
**8**, e1000357.
- [27] Diamond SE, Martin RA. 2021 Buying time: Plasticity and population  
1586 persistence. In Phenotypic Plasticity & Evolution pp. 185–209. CRC Press.
- [28] Ghalambor CK, McKay J, Carroll S, Reznick D. 2007 Adaptive versus non-  
1588 adaptive phenotypic plasticity and the potential for contemporary adaptation  
in new environments. Functional Ecology **21**, 394–407.
- 1590 [29] Ghalambor CK, Hoke KL, Ruell EW, Fischer EK, Reznick DN, Hughes  
1592 KA. 2015 Non-adaptive plasticity potentiates rapid adaptive evolution of  
gene expression in nature. Nature **525**, 372–375.
- [30] Gibert P, Debat V, Ghalambor CK. 2019 Phenotypic plasticity, global  
1594 change, and the speed of adaptive evolution. Current Opinion in Insect  
Science **35**, 34–40.
- 1596 [31] Leonard AM, Lancaster LT. 2020 Maladaptive plasticity facilitates evolution  
of thermal tolerance during an experimental range shift. BMC  
1598 Evolutionary Biology **20**, 1–11.
- [32] Kellermann V, McEvey SF, Sgrò CM, Hoffmann AA. 2020 Phenotypic Plas-  
1600 ticity for Desiccation Resistance, Climate Change, and Future Species Dis-  
tributions: Will Plasticity Have Much Impact?. The American Naturalist  
1602 **196**, 306–315.
- [33] DeWitt TJ, Sih A, Wilson DS. 1998 Costs and limits of phenotypic plas-  
1604 ticity. Trends in Ecology & Evolution **13**, 77–81.
- [34] Auld JR, Agrawal AA, Relyea RA. 2010 Re-evaluating the costs and lim-  
1606 its of adaptive phenotypic plasticity. Proceedings of the Royal Society B:  
Biological Sciences **277**, 503–511.
- 1608 [35] Scheiner SM, Barfield M, Holt RD. 2017 The genetics of phenotypic plastic-  
ity. XV. Genetic assimilation, the Baldwin effect, and evolutionary rescue.  
1610 Ecology and Evolution **7**, 8788–8803.
- [36] Scheiner SM. 1998 The genetics of phenotypic plasticity. VII. Evolution  
1612 in a spatially-structured environment. Journal of Evolutionary Biology **11**,  
303–320.
- 1614 [37] Wright S. 1943 Isolation by distance. Genetics **28**, 114.
- [38] Lande R. 2009 Adaptation to an extraordinary environment by evolution  
1616 of phenotypic plasticity and genetic assimilation. Journal of Evolutionary  
Biology **22**, 1435–1446.
- 1618 [39] Eriksson A, Elías-Wolff F, Mehlig B. 2013 Metapopulation dynamics on  
the brink of extinction. Theoretical Population Biology **83**, 101–122.

- 1620 [40] Eriksson M, Rafajlović M. 2021 The effect of genetic architecture and selfing  
1622 on the capacity of a population to expand its range. *American Naturalist* **197**, 526–542.
- [41] Bridle JR, Kawata M, Butlin RK. 2019 Local adaptation stops where eco-  
1624 logical gradients steepen or are interrupted. *Evolutionary Applications* **12**,  
1449–1462.
- 1626 [42] Bulmer MG. 1980 *The mathematical theory of quantitative genetics*.  
Clarendon Press.
- 1628 [43] Bürger R, Lynch M. 1995 Evolution and extinction in a changing environ-  
ment: a quantitative-genetic analysis. *Evolution* **49**, 151–163.
- 1630 [44] Chevin LM, Cotto O, Ashander J. 2017 Stochastic evolutionary demog-  
1632 raphy under a fluctuating optimum phenotype. *The American Naturalist*  
**190**, 786–802.
- [45] King JG, Hadfield JD. 2019 The evolution of phenotypic plasticity when  
1634 environments fluctuate in time and space. *Evolution Letters* **3**, 15–27.
- [46] Van Buskirk J. 2017 Spatially heterogeneous selection in nature favors phe-  
1636 notypic plasticity in anuran larvae. *Evolution* **71**, 1670–1685.
- [47] Carbonell J, Bilton D, Calosi P, Millán A, Stewart A, Velasco J. 2017  
1638 Metabolic and reproductive plasticity of core and marginal populations of  
the eurythermic saline water bug *Sigara selecta* (Hemiptera: Corixidae) in  
1640 a climate change context. *Journal of Insect Physiology* **98**, 59–66.
- [48] Tufto J. 2015 Genetic evolution, plasticity, and bet-hedging as adaptive re-  
1642 sponses to temporally autocorrelated fluctuating selection: A quantitative  
genetic model. *Evolution* **69**, 2034–2049.
- 1644 [49] Arnold PA, Nicotra AB, Kruuk LEB. 2019 Sparse evidence for selec-  
tion on phenotypic plasticity in response to temperature. *Philosophical*  
1646 *Transactions of the Royal Society B: Biological Sciences* **374**, 20180185.
- [50] Pulliam HR. 1988 Sources, sinks, and population regulation. *The American*  
1648 *Naturalist* **132**, 652–661.
- [51] Via S, Lande R. 1985 Genotype-environment interaction and the evolution  
1650 of phenotypic plasticity. *Evolution* **39**, 505–522.
- [52] Van Buskirk J, Steiner UK. 2009 The fitness costs of developmental canal-  
1652 ization and plasticity. *Journal of Evolutionary Biology* **22**, 852–860.
- [53] Murren CJ, Auld JR, Callahan H, Ghalambor CK, Handelsman CA, Hes-  
1654 kel MA, Kingsolver J, Maclean HJ, Masel J, Maughan H et al.. 2015 Con-  
straints on the evolution of phenotypic plasticity: limits and costs of phe-  
1656 notype and plasticity. *Heredity* **115**, 293–301.

- 1658 [54] Gavrillets S, Scheiner SM. 1993 The genetics of phenotypic plasticity. V.  
Evolution of reaction norm shape. Journal of Evolutionary Biology **6**, 31–  
48.
- 1660 [55] De Jong G. 1999 Unpredictable selection in a structured population  
1662 leads to local genetic differentiation in evolved reaction norms. Journal  
of Evolutionary Biology **12**, 839–851.
- [56] Scheiner SM. 2018 The genetics of phenotypic plasticity. XVI. Interactions  
1664 among traits and the flow of information. Evolution **72**, 2292–2307.
- [57] Pigliucci M, Diiorio P, Schlichting CD. 1997 Phenotypic plasticity of growth  
1666 trajectories in two species of *Lobelia* in response to nutrient availability.  
Journal of Ecology pp. 265–276.
- 1668 [58] Lande R. 2014 Evolution of phenotypic plasticity and environmental toler-  
1670 ance of a labile quantitative character in a fluctuating environment. Journal  
of Evolutionary Biology **27**, 866–875.
- [59] Leung C, Rescan M, Grulois D, Chevin LM. 2020 Reduced phenotypic plas-  
1672 ticity evolves in less predictable environments. Ecology Letters **23**, 1664–  
1672.
- 1674 [60] Gabriel W. 2005 How stress selects for reversible phenotypic plasticity.  
Journal of Evolutionary Biology **18**, 873–883.
- 1676 [61] Lande R. 2015 Evolution of phenotypic plasticity in colonizing species.  
Molecular Ecology **24**, 2038–2045.
- 1678 [62] Lenormand T, Otto SP. 2000 The evolution of recombination in a hetero-  
geneous environment. Genetics **156**, 423–438.
- 1680 [63] Peck JR, Yearsley JM, Waxman D. 1998 Explaining the geographic distri-  
butions of sexual and asexual populations. Nature **391**, 889–892.
- 1682 [64] Fouqueau L, Roze D. 2021 The evolution of sex along an environmental  
gradient. Evolution.
- 1684 [65] Leimar O, Dall SR, McNamara JM, Kuijper B, Hammerstein P. 2019 Eco-  
1686 logical genetic conflict: genetic architecture can shift the balance between  
local adaptation and plasticity. American Naturalist **193**, 70–80.
- [66] Sippel S, Meinshausen N, Fischer EM, Székely E, Knutti R. 2020 Climate  
1688 change now detectable from any single day of weather at global scale.  
Nature Climate Change **10**, 35–41.
- 1690 [67] Valenzuela N, Literman R, Neuwald JL, Mizoguchi B, Iverson JB, Riley JL,  
1692 Litzgus JD. 2019 Extreme thermal fluctuations from climate change unex-  
pectedly accelerate demographic collapse of vertebrates with temperature-  
dependent sex determination. Scientific Reports **9**, 1–11.

- 1694 [68] Van Oppen MJ, Oliver JK, Putnam HM, Gates RD. 2015 Building coral reef  
resilience through assisted evolution. Proceedings of the National Academy  
of Sciences **112**, 2307–2313.  
1696
- [69] Van Oppen MJ, Gates RD, Blackall LL, Cantin N, Chakravarti LJ, Chan  
1698 WY, Cormick C, Crean A, Damjanovic K, Epstein H et al.. 2017 Shifting  
paradigms in restoration of the world’s coral reefs. Global Change Biology  
1700 **23**, 3437–3448.
- [70] Gibbin EM, N’Siala GM, Chakravarti LJ, Jarrold MD, Calosi P. 2017 The  
1702 evolution of phenotypic plasticity under global change. Scientific Reports  
**7**, 1–8.
- [71] Pazzaglia J, Reusch TB, Terlizzi A, Marín-Guirao L, Procaccini G. 2021  
1704 Phenotypic plasticity under rapid global changes: The intrinsic force for  
future seagrasses survival. Evolutionary Applications.  
1706
- [72] Mačić V, Albano PG, Almpanidou V, Claudet J, Corrales X, Essl F,  
1708 Evagelopoulos A, Giovos I, Jimenez C, Kark S et al.. 2018 Biological in-  
vasions in conservation planning: a global systematic review. Frontiers in  
Marine Science **5**, 178.  
1710
- [73] Geng YP, Pan XY, Xu CY, Zhang WJ, Li B, Chen JK, Lu BR, Song  
1712 ZP. 2007 Phenotypic plasticity rather than locally adapted ecotypes allows  
the invasive alligator weed to colonize a wide range of habitats. Biological  
Invasions **9**, 245–256.  
1714
- [74] Davidson AM, Jennions M, Nicotra AB. 2011 Do invasive species show  
1716 higher phenotypic plasticity than native species and, if so, is it adaptive?  
A meta-analysis. Ecology Letters **14**, 419–431.
- [75] Ren GQ, Yang HY, Li J, Prabakaran K, Dai ZC, Wang XP, Jiang K,  
1718 Zou CB, Du DL. 2020 The effect of nitrogen and temperature changes on  
Solidago canadensis phenotypic plasticity and fitness. Plant Species Biology  
1720 **35**, 283–299.
- [76] Xue Q, Ma CS. 2020 Aged virgin adults respond to extreme heat events with  
1722 phenotypic plasticity in an invasive species, *Drosophila suzukii*. Journal of  
Insect Physiology **121**, 104016.  
1724
- [77] Chown SL, Slabber S, McGeoch MA, Janion C, Leinaas HP. 2007 Phe-  
1726 notypic plasticity mediates climate change responses among invasive and  
indigenous arthropods. Proceedings of the Royal Society B: Biological  
Sciences **274**, 2531–2537.  
1728
- [78] Zenni RD, Lamy JB, Lamarque LJ, Porté AJ. 2014 Adaptive evolution and  
1730 phenotypic plasticity during naturalization and spread of invasive species:  
implications for tree invasion biology. Biological Invasions **16**, 635–644.



- 1732 [79] Falaschi M, Melotto A, Manenti R, Ficetola GF. 2020 Invasive species and  
amphibian conservation. Herpetologica **76**, 216–227.
- 1734 [80] Rathee S, Ahmad M, Sharma P, Singh HP, Batish DR, Kaur S, Kaur A,  
1736 Yadav SS, Kohli RK. 2021 Biomass allocation and phenotypic plasticity  
are key elements of successful invasion of *Parthenium hysterophorus* at  
high elevation. Environmental and Experimental Botany **184**, 104392.
- 1738 [81] Pease CM, Lande R, Bull J. 1989 A model of population growth, dispersal  
and evolution in a changing environment. Ecology **70**, 1657–1664.
- 1740 [82] Barton N, Turelli M. 1991 Natural and sexual selection on many loci..  
Genetics **127**, 229–255.
- 1742 [83] Lande R. 2007 Expected relative fitness and the adaptive topography of  
fluctuating selection. Evolution **61**, 1835–1846.
- 1744 [84] Rudin W. 1964 Principles of mathematical analysis vol. 3. McGraw-Hill  
New York.
- 1746 [85] Slatkin M. 1973 Gene flow and selection in a cline. Genetics **75**, 733–756.
